# Supplementary material for: Promising bioactivity of curcumin derivatives against malaria: in silico, in vitro and ITC studies
Source: Research Square preprint supplement (doi:10.21203/rs.3.rs-7148737/v1), 2025-08-08
Supplement: Supplementary file 1 [file 2a75538bf947dc2c888edbee.docx]

**Results from molecular docking assessments**

**Table S1**. Molecular docking results of curcumin and 21 derivative compounds with GSK-3β (PDB ID: 1Q5K)

| Compounds | Binding Affinity, kcal/mol | Inhibition constant (Ki), nM |
| --- | --- | --- |
| TMU1 | -6.45 | 5.40 |
| Curcumin | -7.44 | 1.02 |
| 2 | -8.77 | 0.06 |
| 3 | -9.42 | 1.04 |
| 4 | -9.07 | 1.01 |
| 5 | -5.98 | 223.89 |
| 6 | -9.08 | 0.28 |
| 7 | -5.39 | 281.04 |
| 8 | -4.12 | 629.76 |
| 9 | -5.98 | 727.29 |
| 10 | -10.31 | 0.03 |
| 11 | -5.09 | 19.29 |
| 12 | -5.37 | 956.65 |
| 13 | -5.23 | 133.67 |
| 14 | -5.5 | 480.41 |
| 16 | -6.79 | 266.83 |
| 17 | -8.09 | 23.10 |
| 18 | -8.73 | 12.77 |
| 19 | -4.45 | 627.64 |
| 20 | -8.16 | 3.37 |
| 21 | -8.10 | 1.15 |
| 22 | -8.97 | 0.27 |


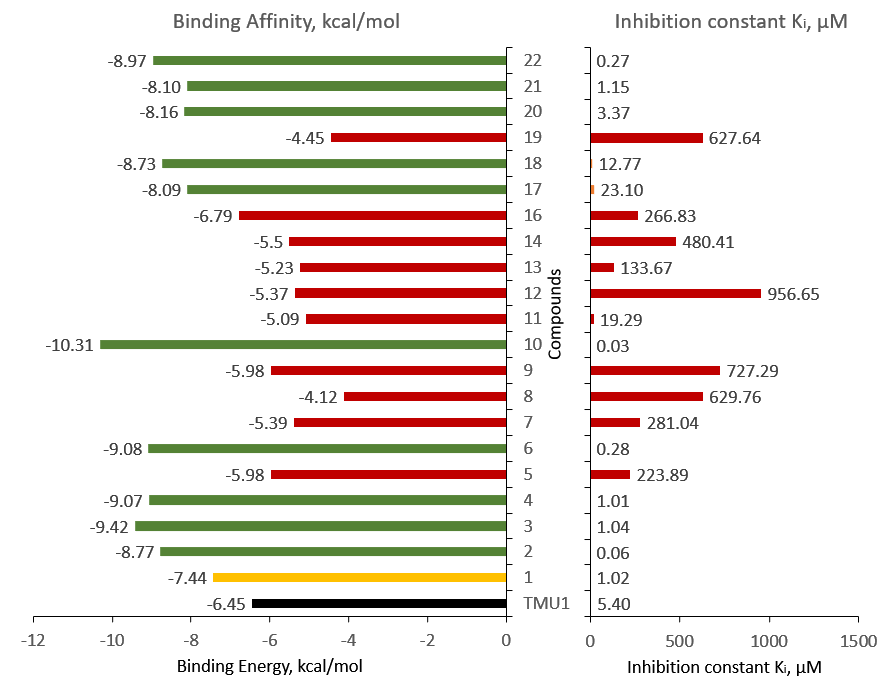


**Figure S1**. Graphic comparison of the binding affinity and inhibition constant from the docking of TMU1, curcumin and the derivatives to GSK-3β

**Table S2.** Visualisation of the docking of curcumin and the derivatives to GSK-3β, showing the intermolecular interactions between the ligand and the amino acid residues of the protein

| **Curcumin** |  |
| --- | --- |
| 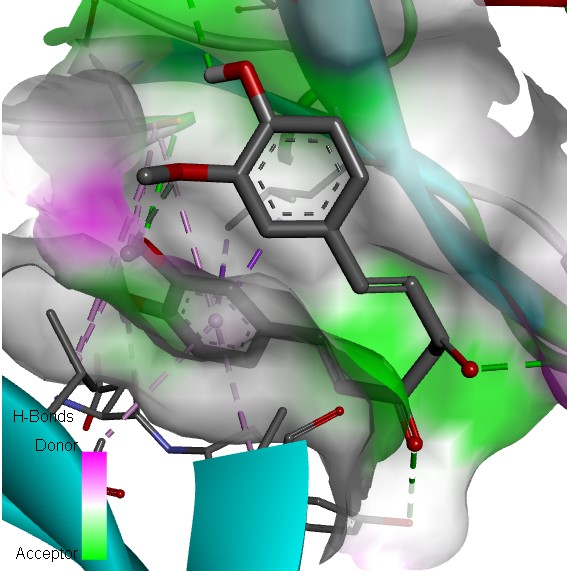 | 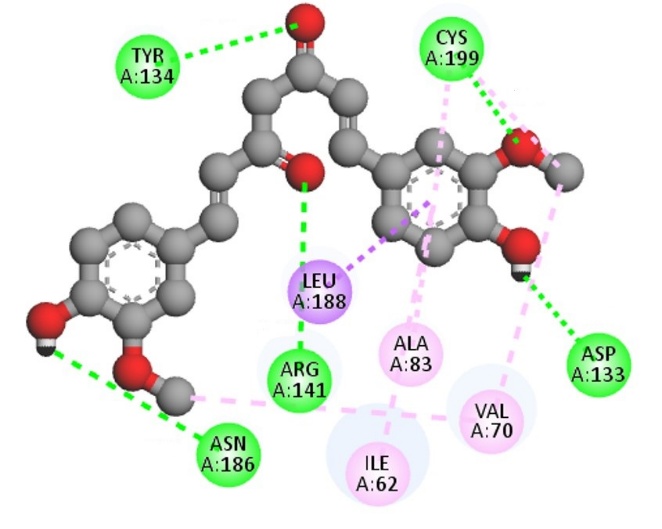 |
| Derivative **2** |  |
| 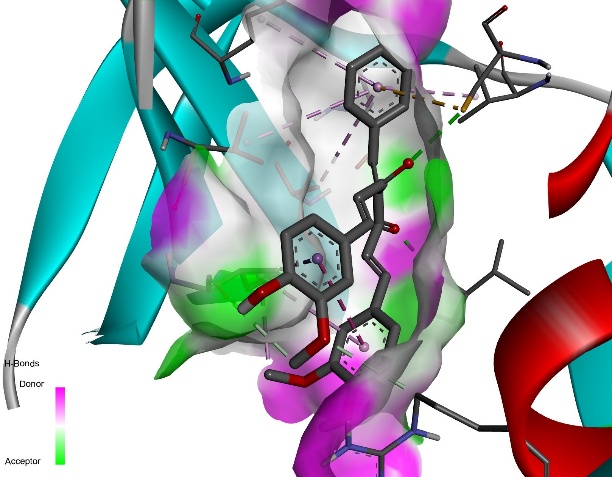 | 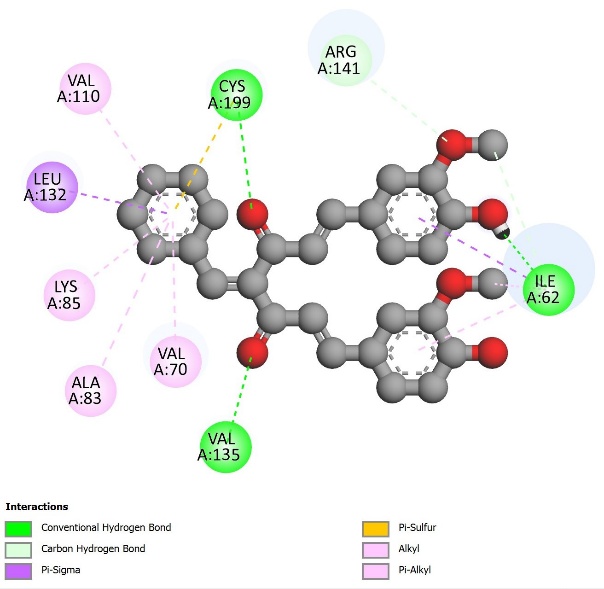 |
| Derivative **3** |  |
| 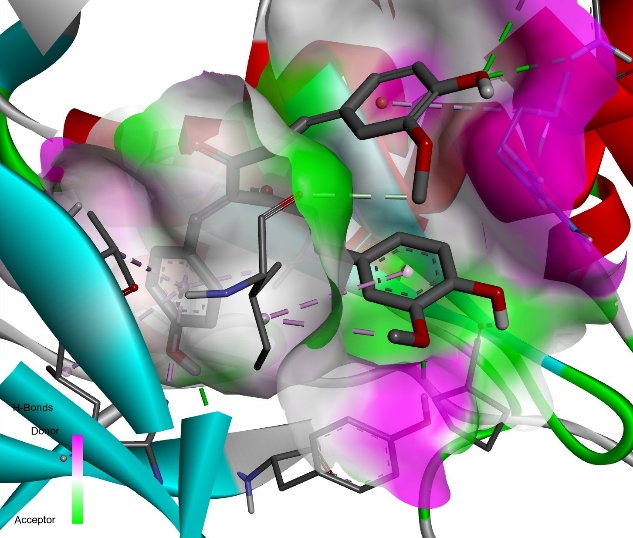 | 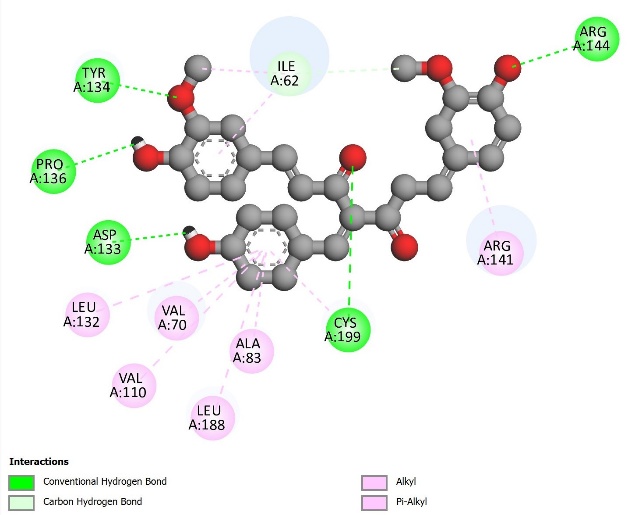 |

| Derivative **4** |  |
| --- | --- |
| 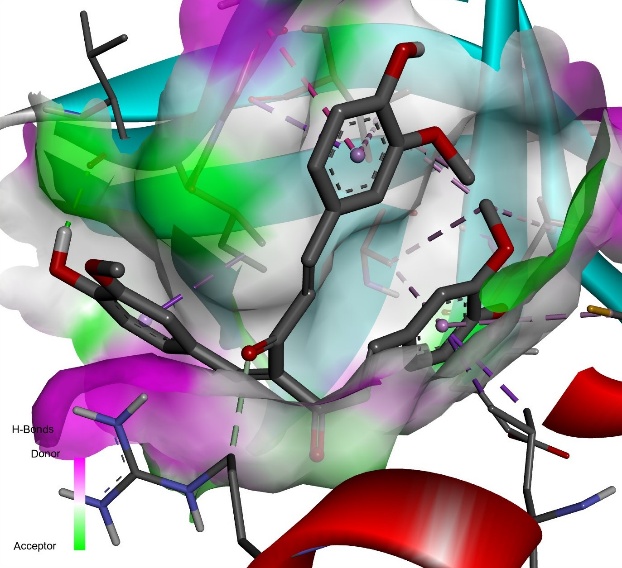 | 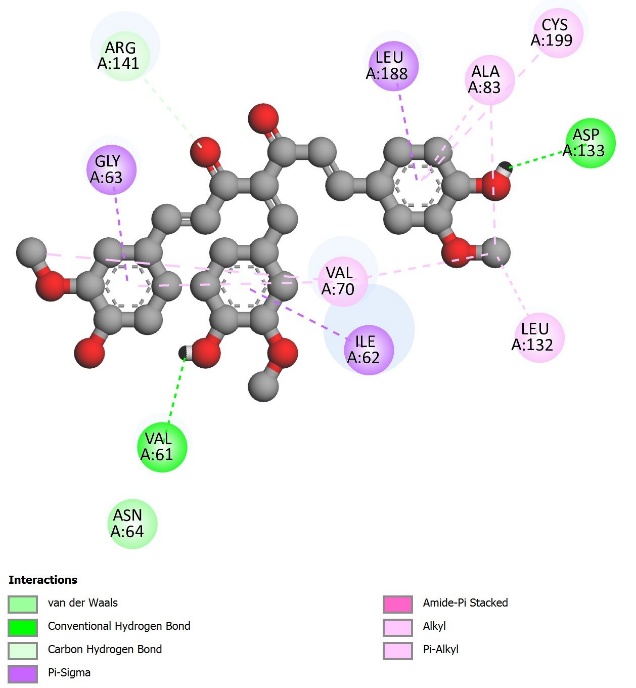 |
| Derivative **6** |  |
| 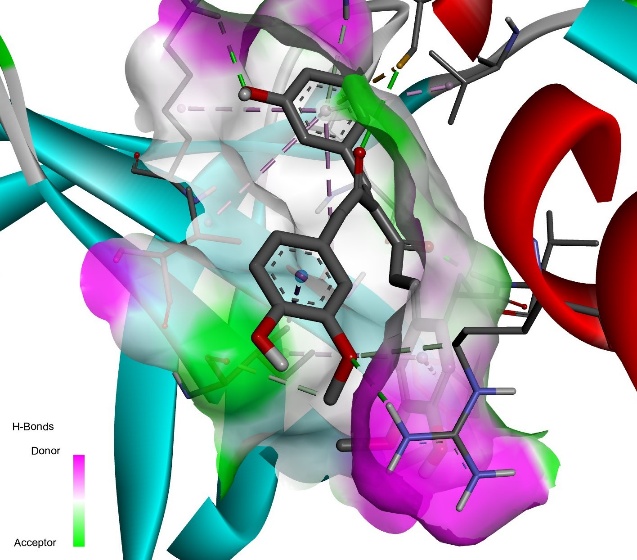 | 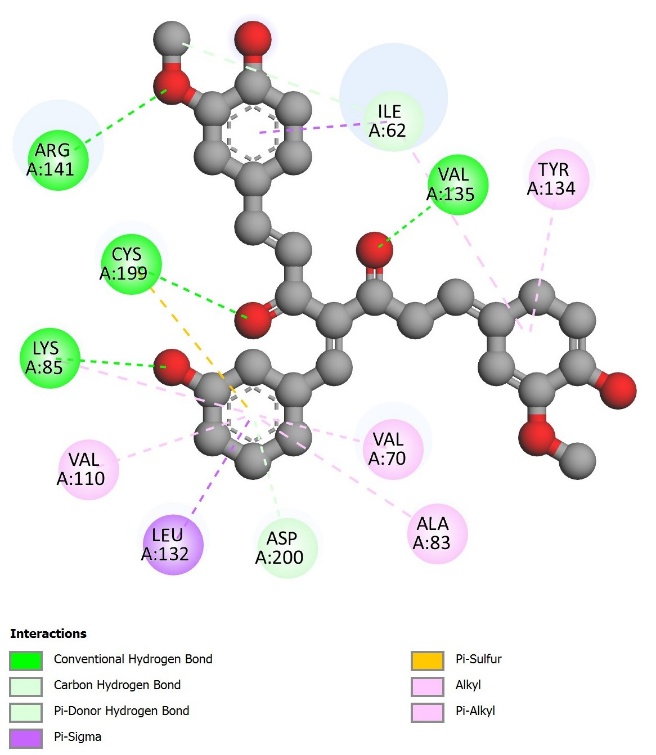 |
| Derivative **10** |  |
| 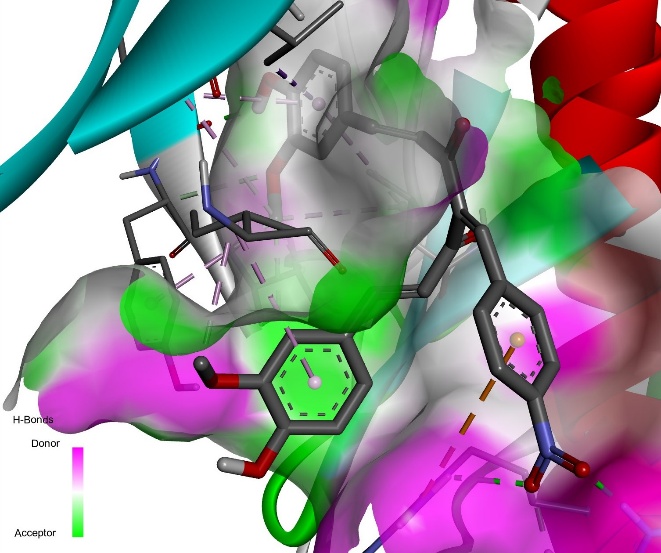 | 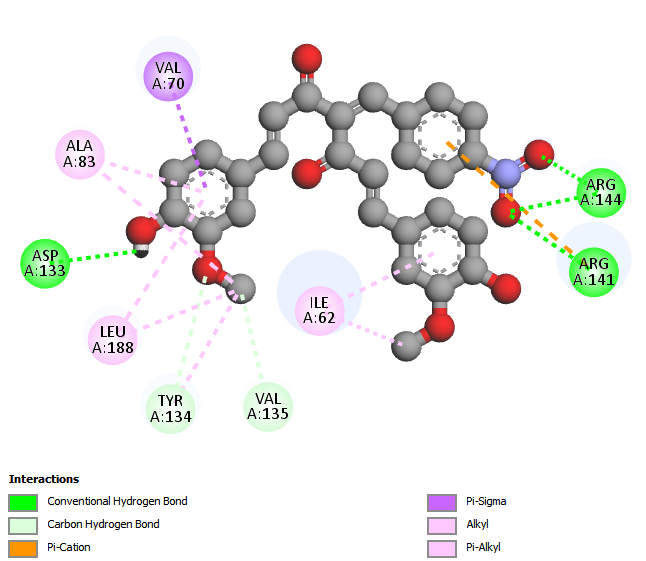 |

| Derivative **17** |  |
| --- | --- |
| 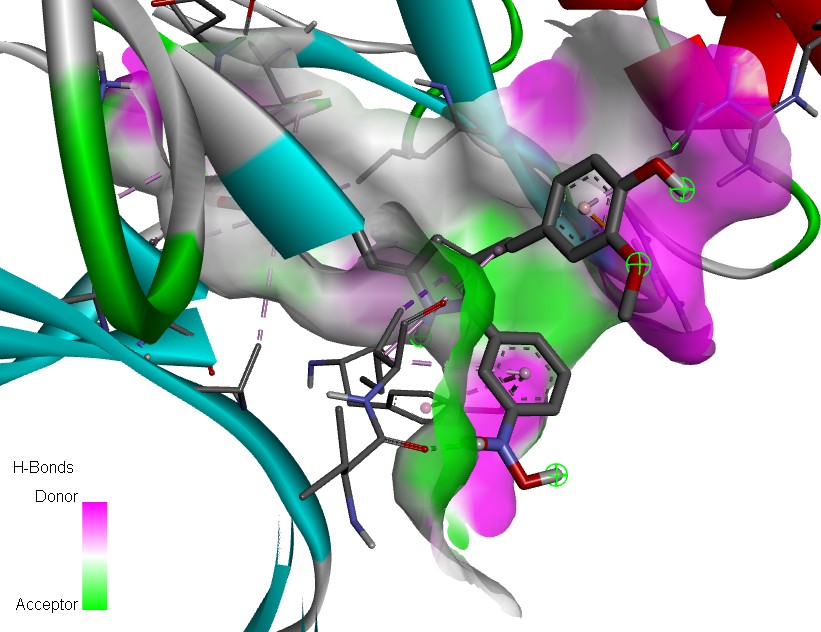 | 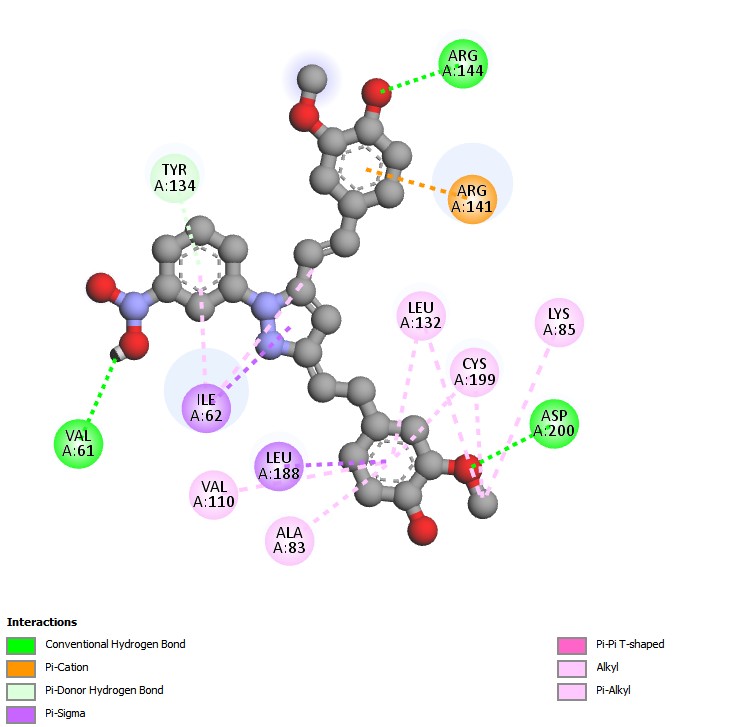 |
| Derivative  **18** |  |
| 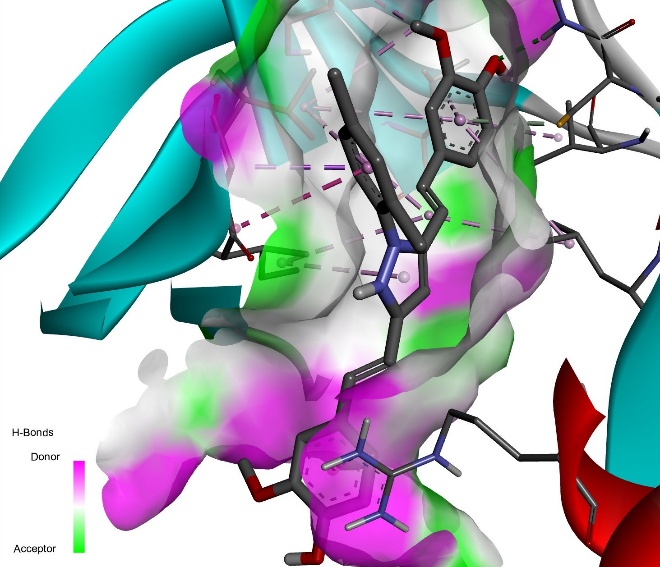 | 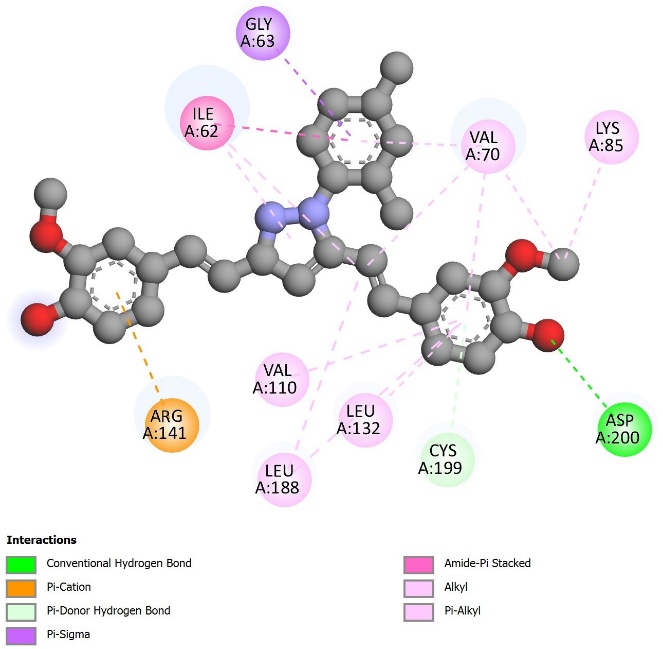 |
| Derivative **20** |  |
| 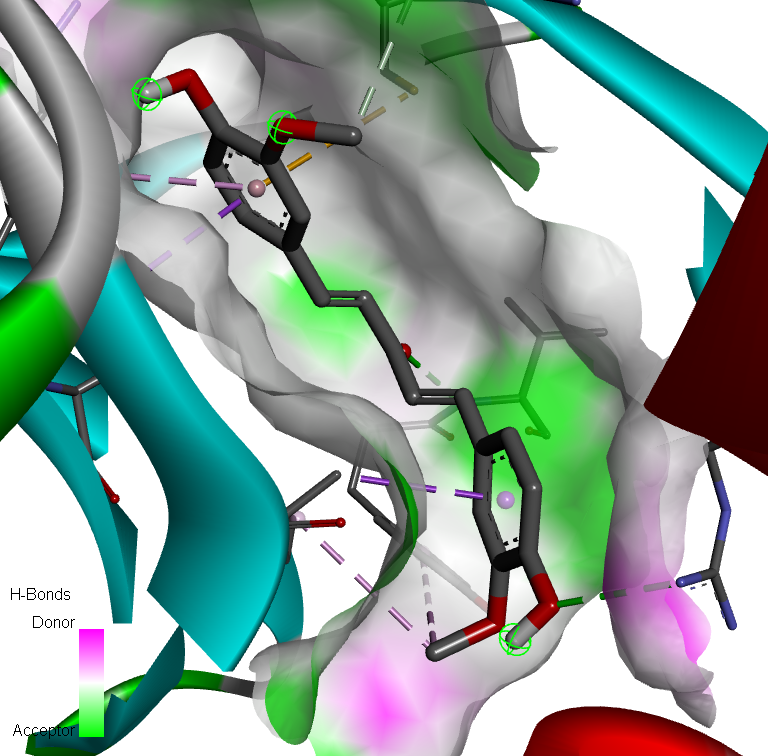 | 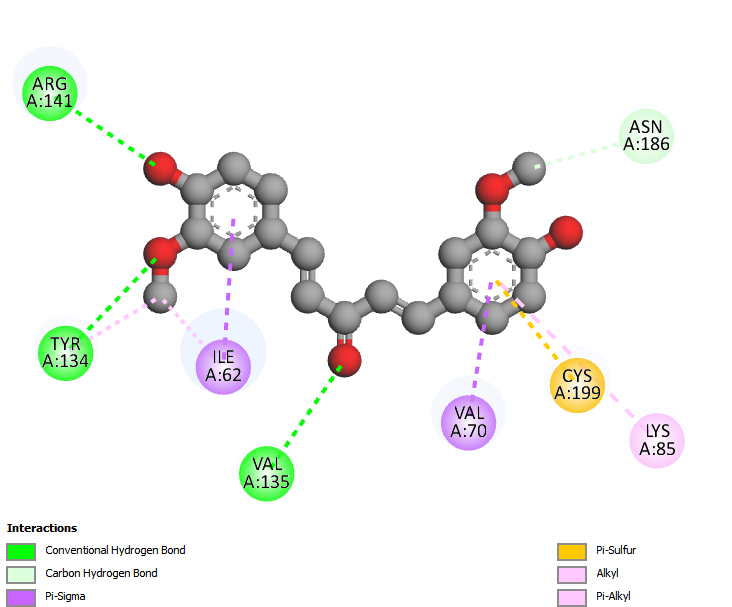 |

| Derivative **21** |  |
| --- | --- |
| 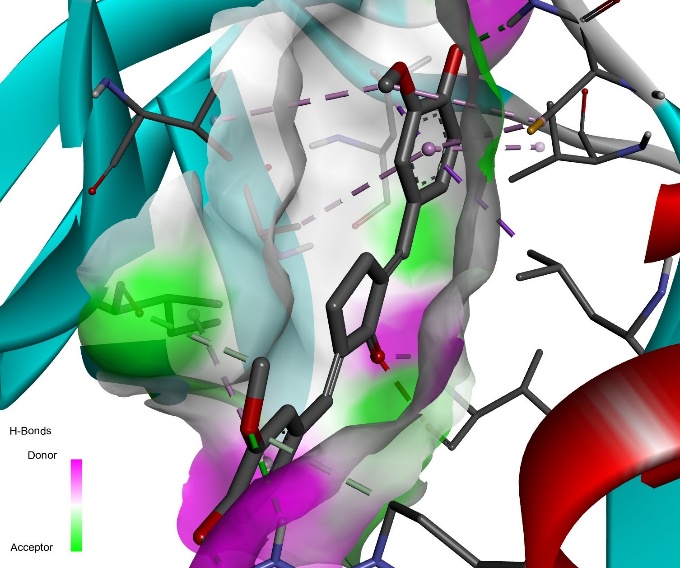 | 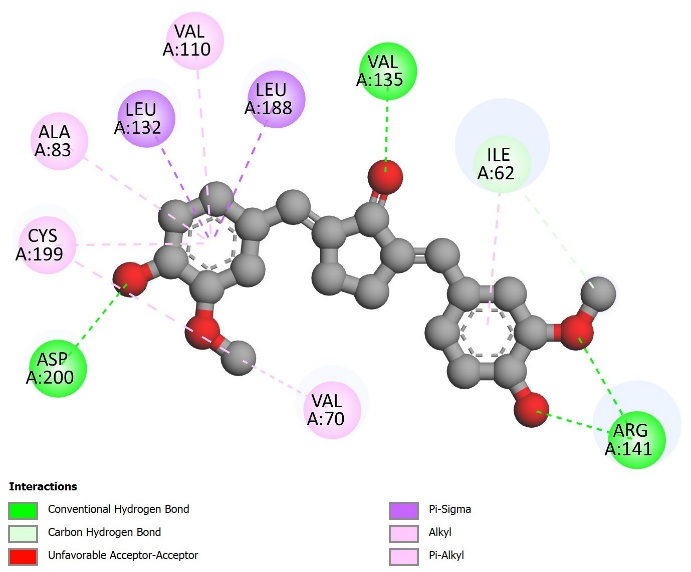 |
| Derivative **22** |  |
| 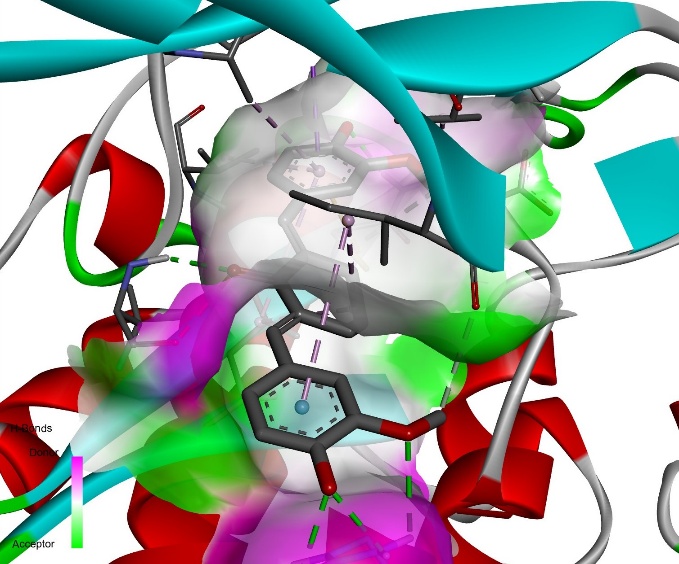 | 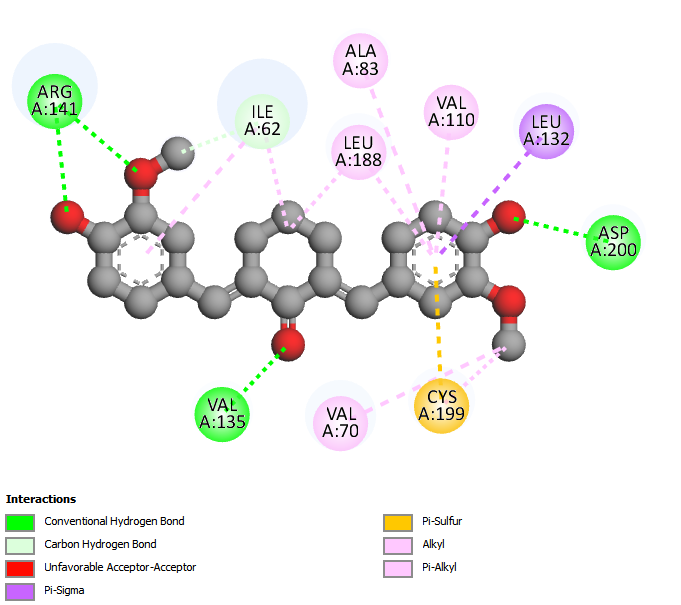 |
| 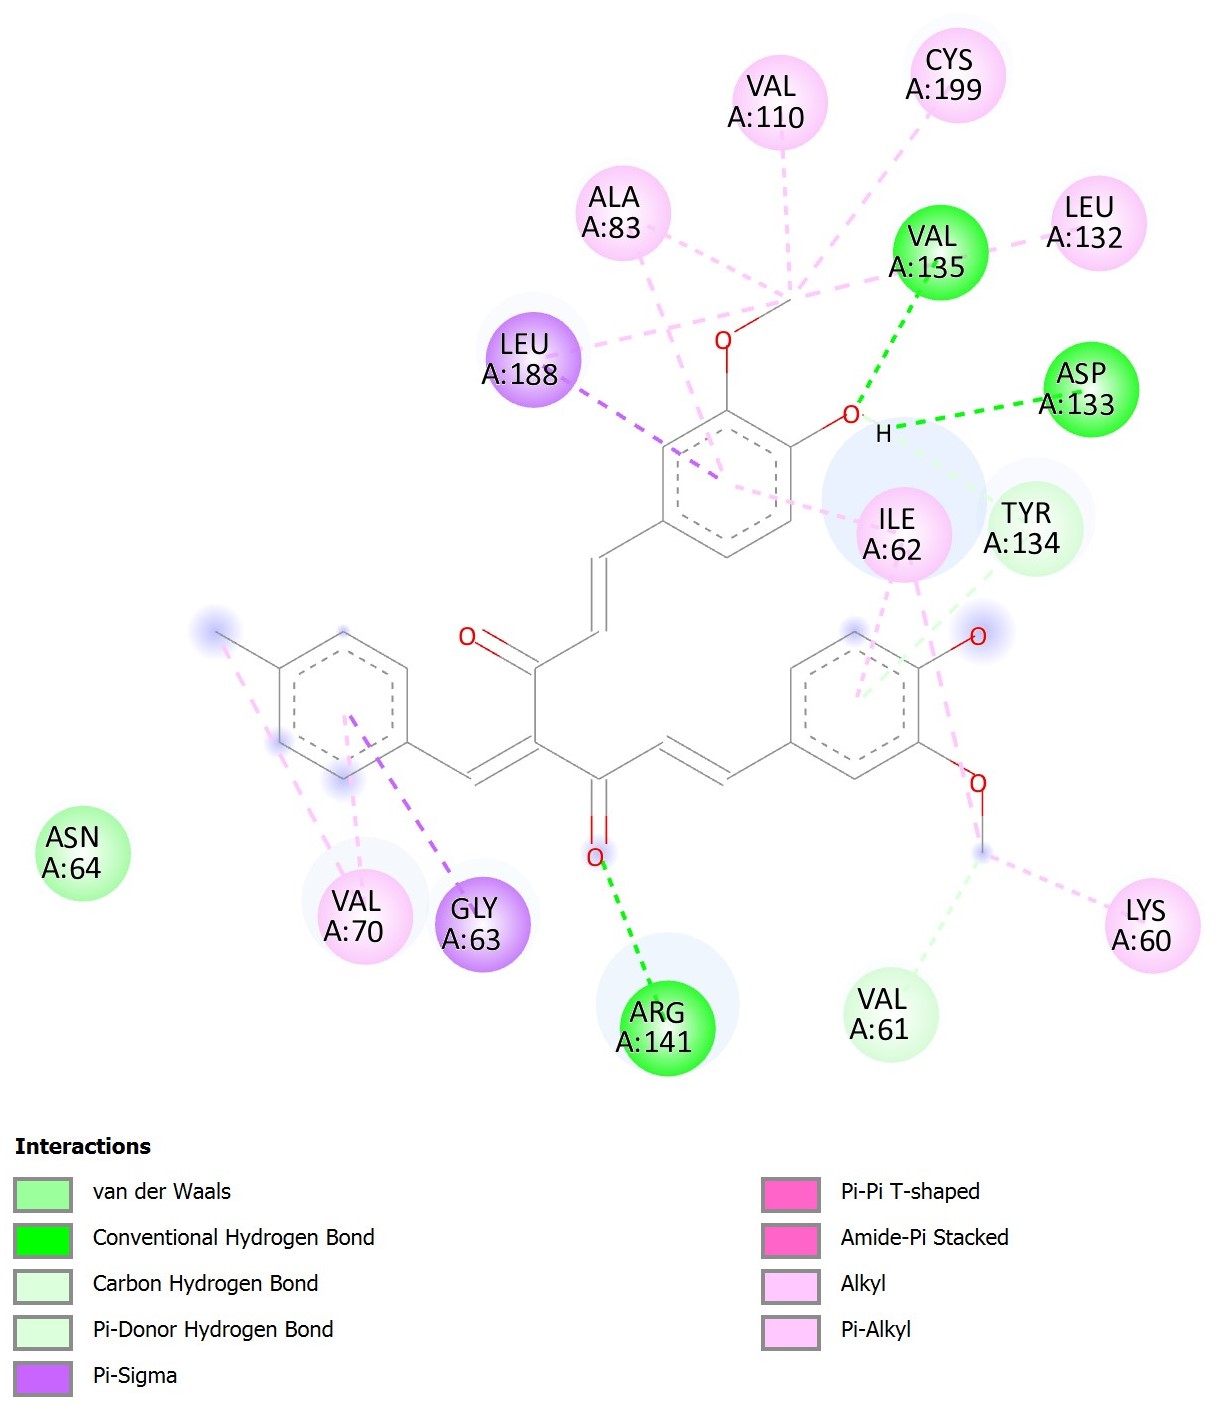  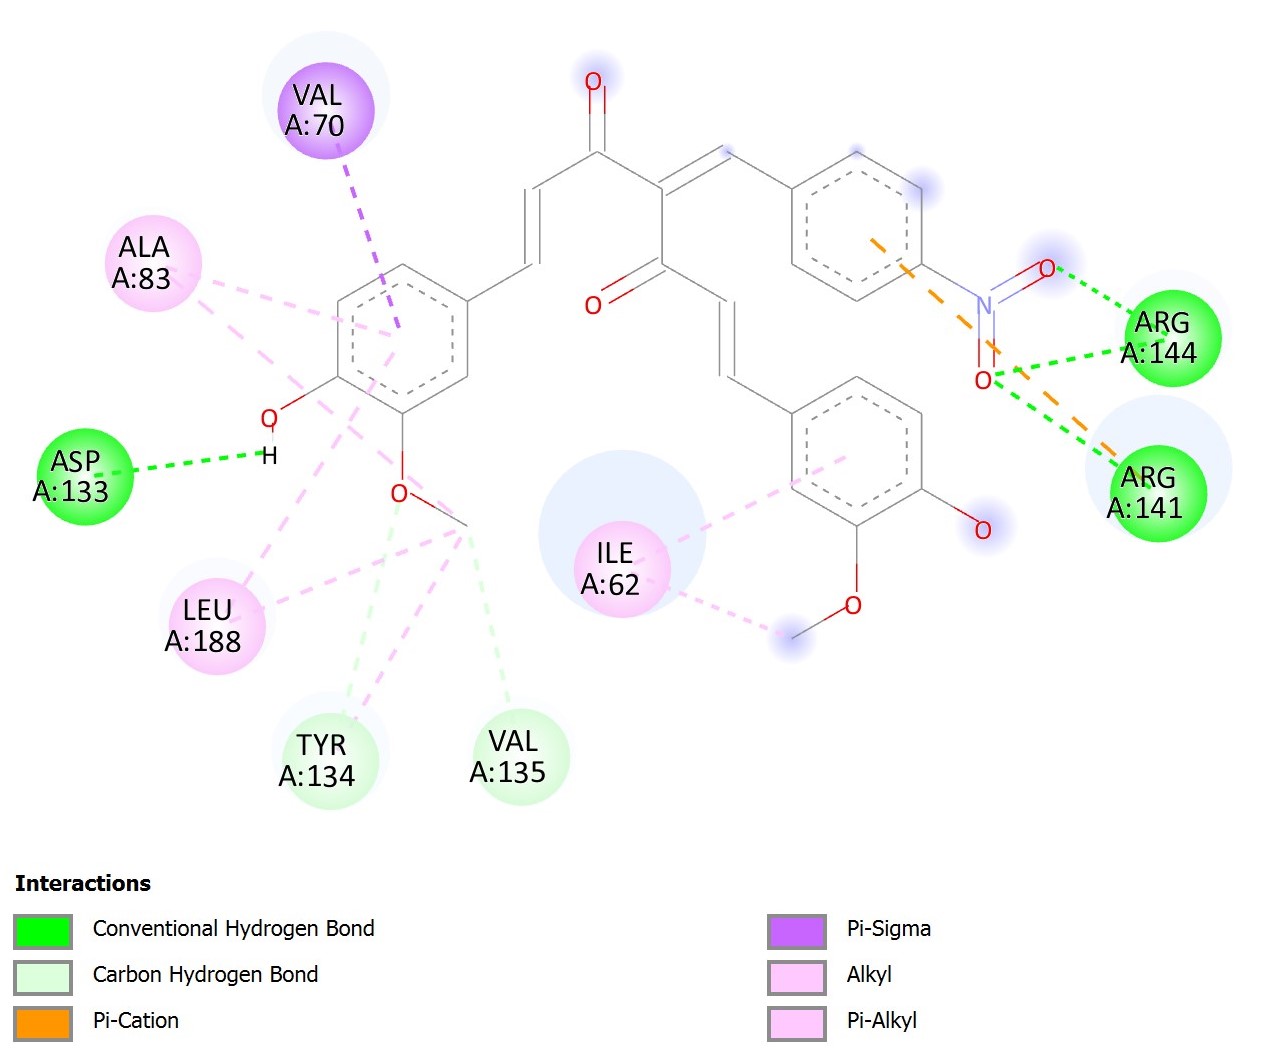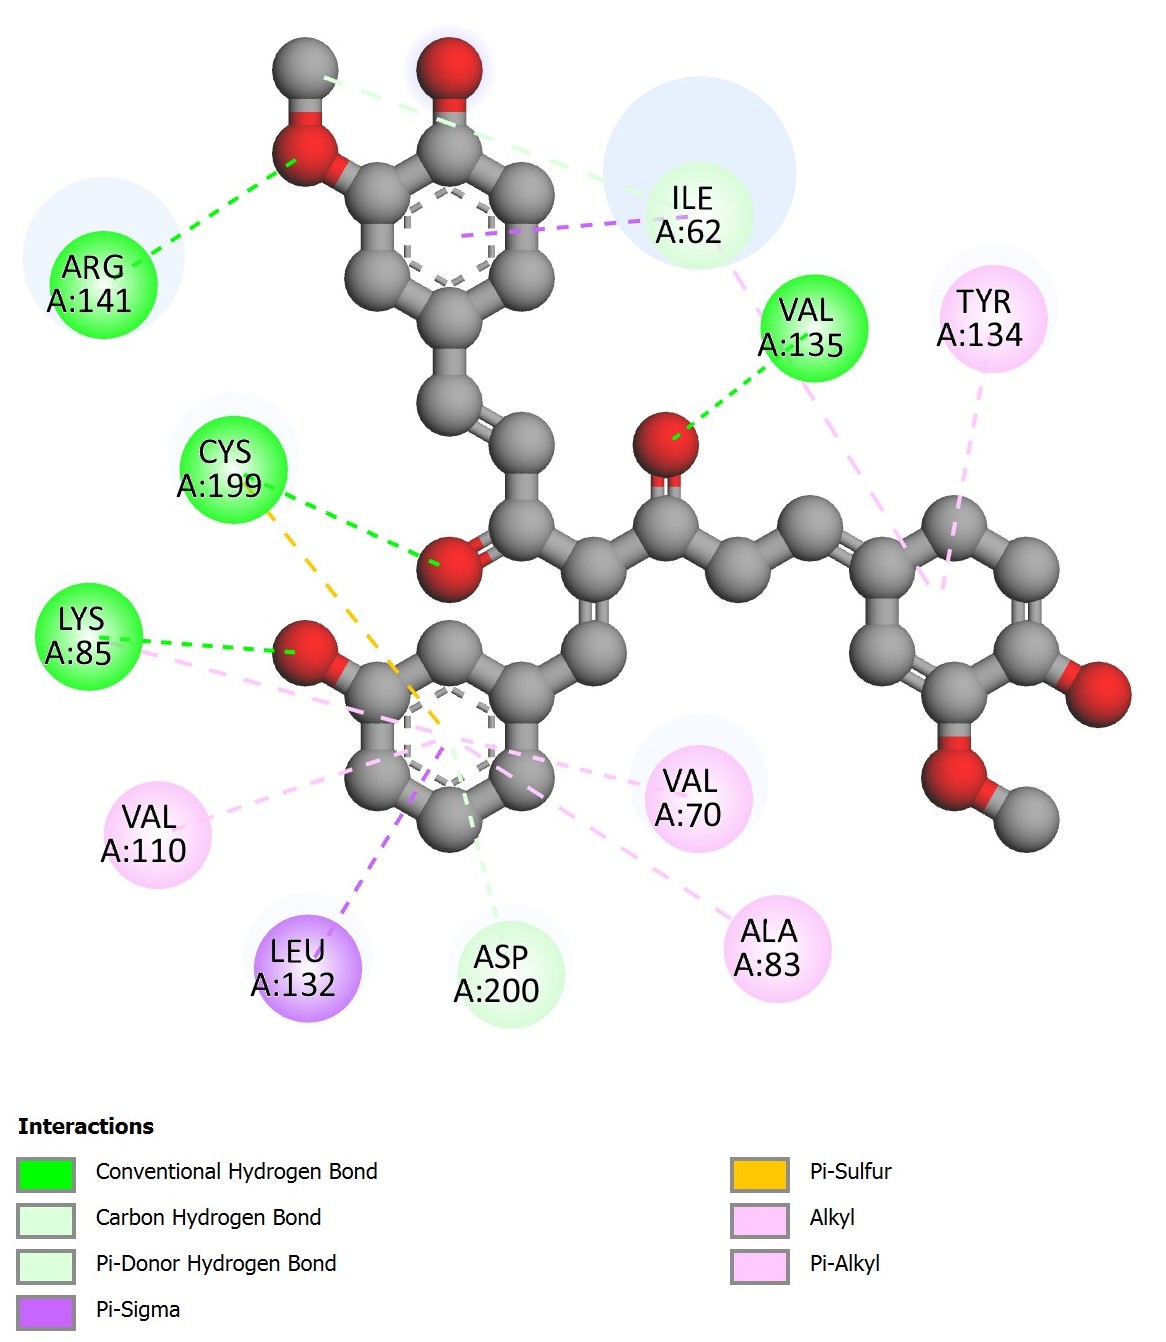  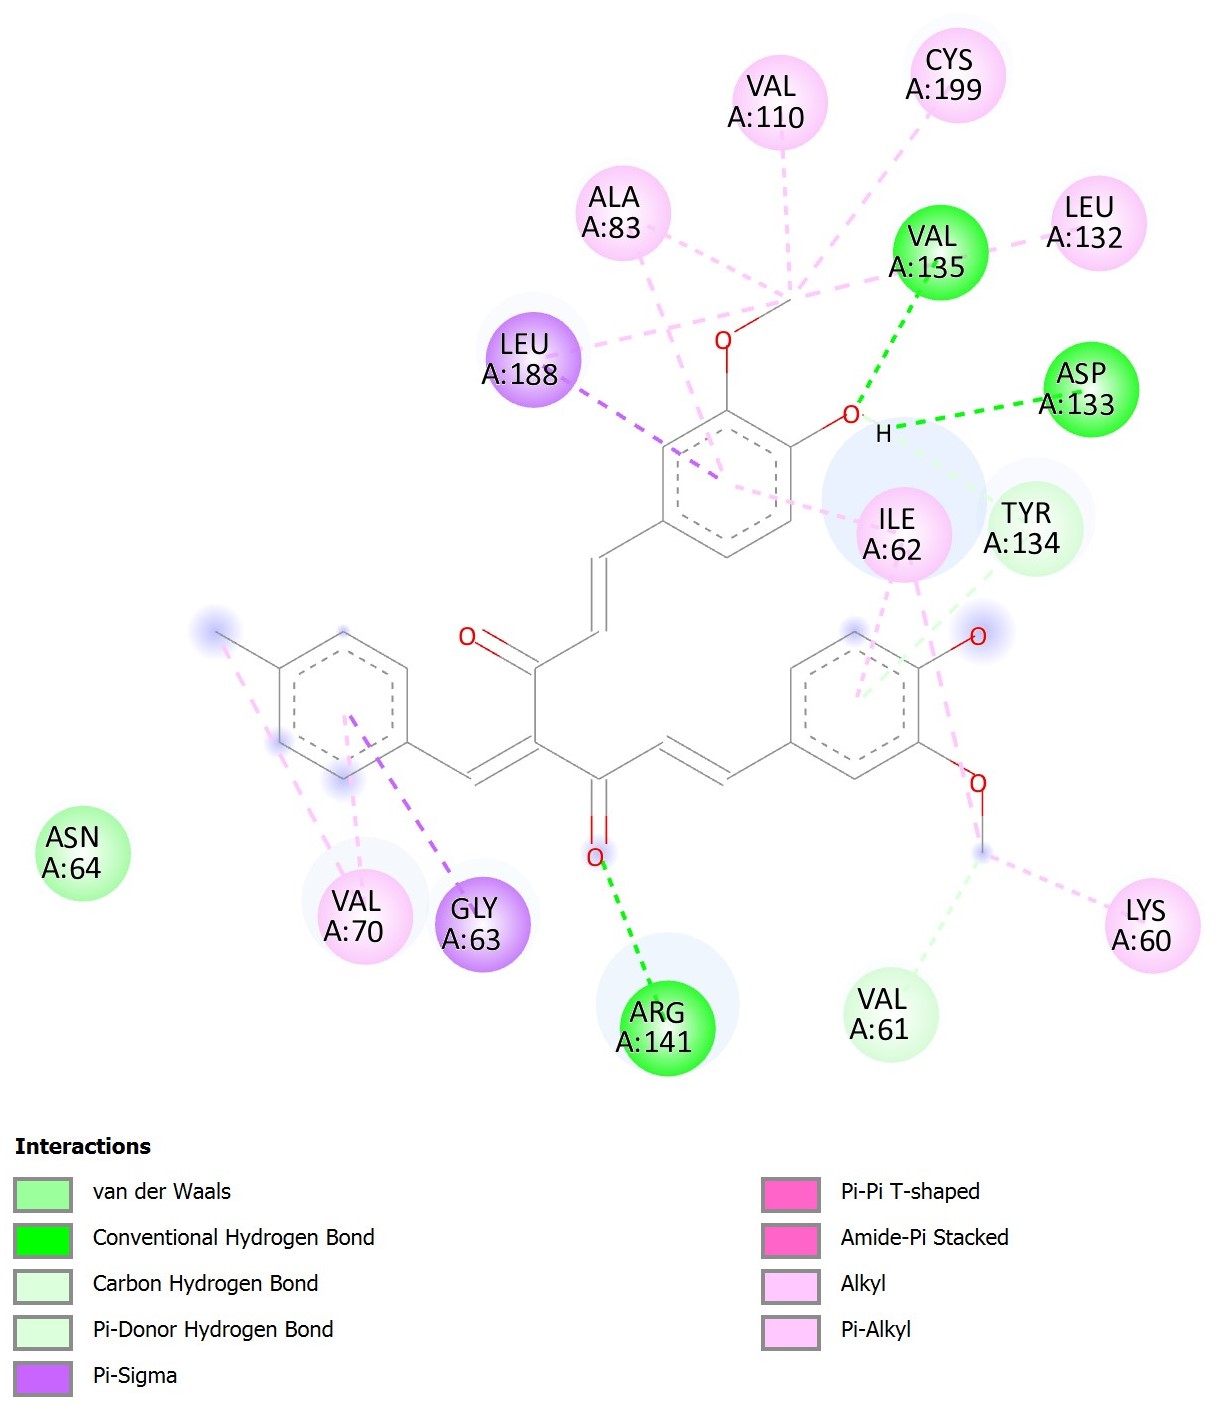 | |

**Calculation details of the electronic and global reactivity parameters from DFT calculations** [1, 2]

1. Ionisation potential
2. Electron affinity
3. Chemical potential (μ) represents the energy change of the system which can be defined as the ability of the system to gain electrons.

It is correlated with the HOMO and LUMO energy gap, in which the smaller gaps indicate higher chemical reactivity. According to Koopmans’ theorem, and

Therefore, )

1. Chemical hardness (η), proposed by Parr and Pearson [3] is defined as follows:
2. Electronegativity (ꭓ)
3. Electrophilicity index (ω) determines the electrophilicity (ability to accept electrons) and nucleophilicity (ability to donate electrons) of a chemical system, which is defined by Parr et al. [3] as follows:

| 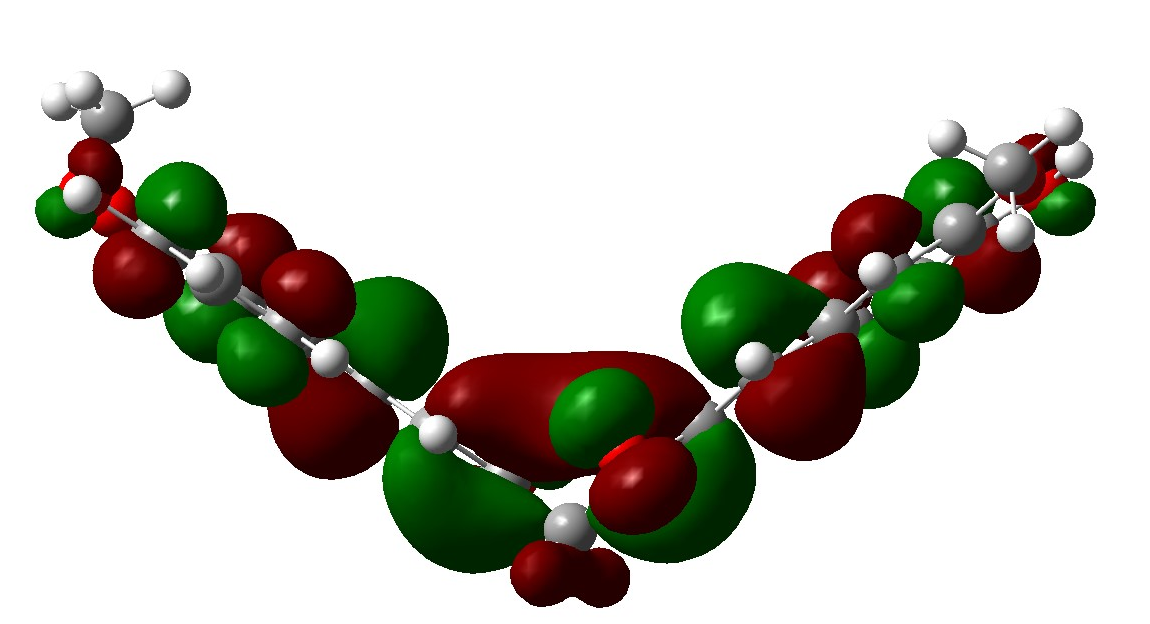 | LUMO  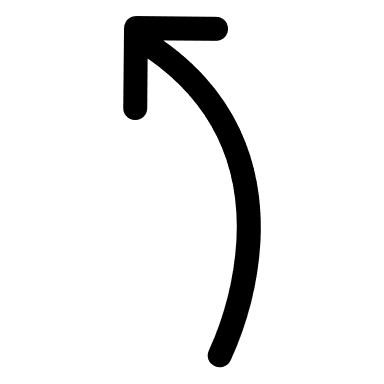–2.3957 eV | 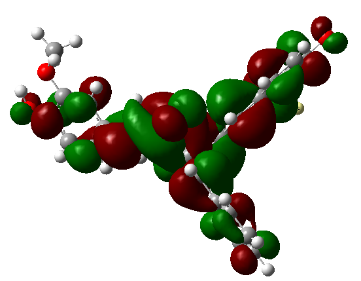 | LUMO  –2.3143eV |
| --- | --- | --- | --- |
| **­­- - - - - - - - - - - - - - - - - - - - -** | **3.5990 eV** | **­­- - - - - - - - - - - - - - - - - - - -** | **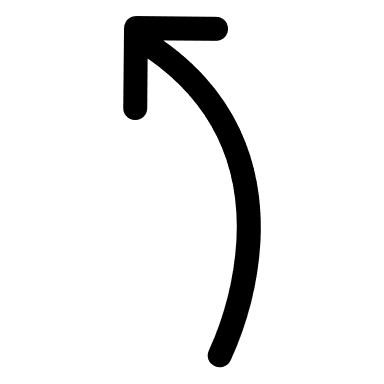3.6186 eV** |
| 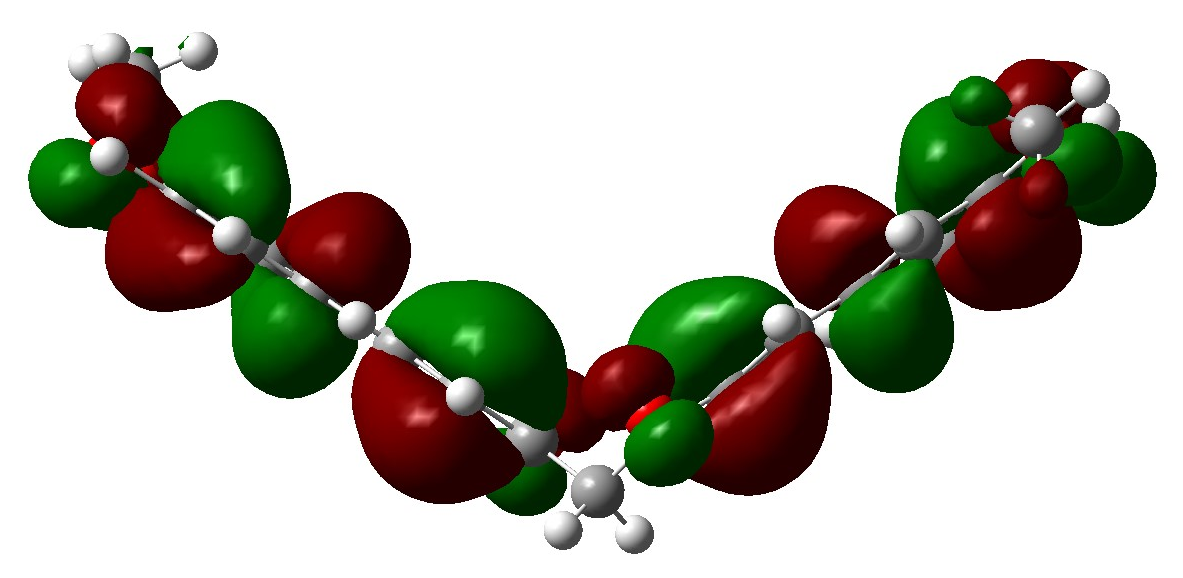 | HOMO  –5.9947 eV | 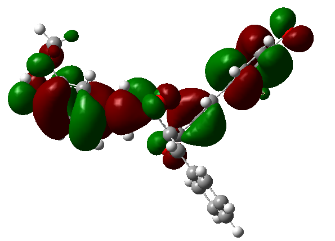 | HOMO  –5.9329 eV |
| **Curcumin** |  | Derivative **2** |  |
| 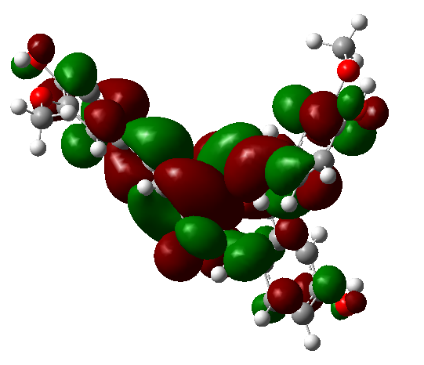 | LUMO  –2.2781 eV | 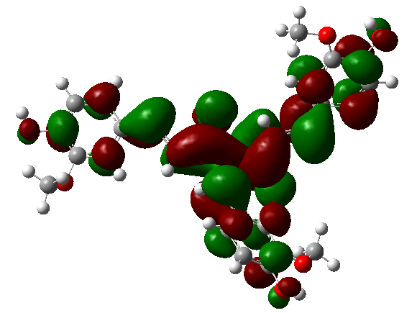 | LUMO  –2.3913 eV |
| **­­- - - - - - - - - - - - - - - - - - - - -** | **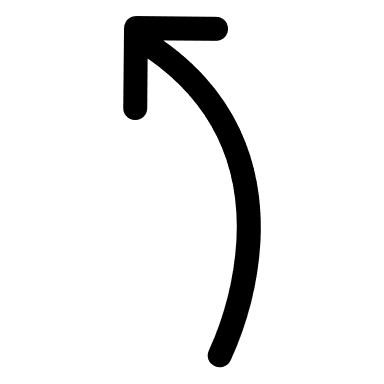3.6145 eV** | **­­- - - - - - - - - - - - - - - - - - - -** | **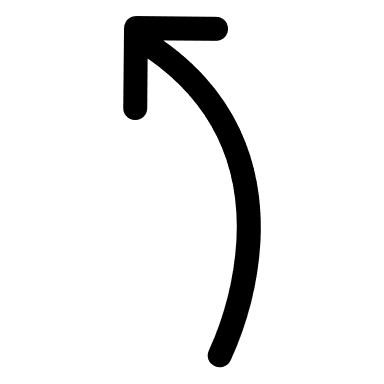3.3984 eV** |
| 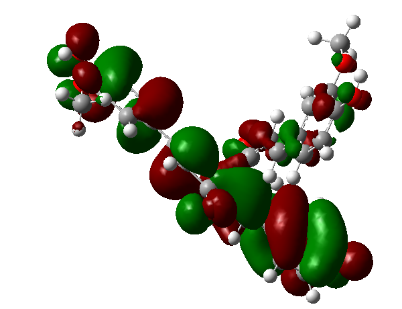 | HOMO  –5.8926 eV | 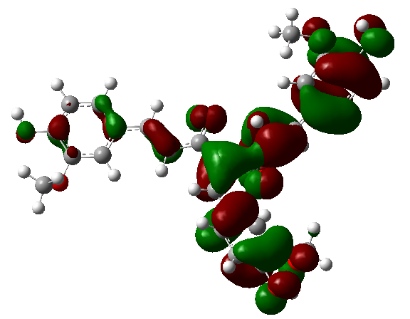 | HOMO  –5.7898 eV |
| Derivative **3** |  | Derivative **4** |  |
| 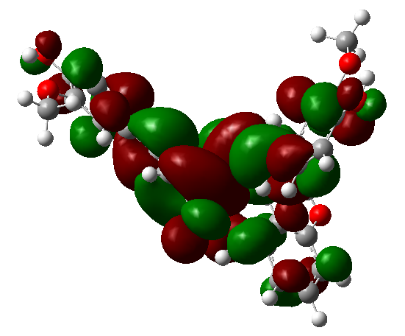 | LUMO  –2.3674 eV | 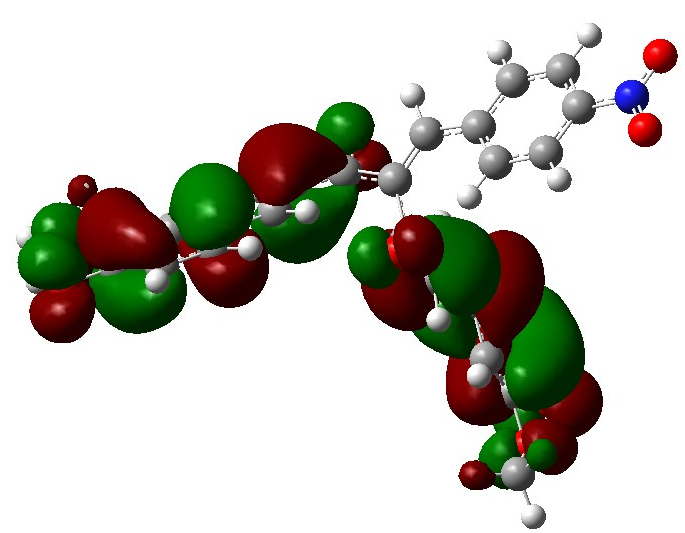 | LUMO  –2.9549 eV |
| **­­- - - - - - - - - - - - - - - - - - - - -** | **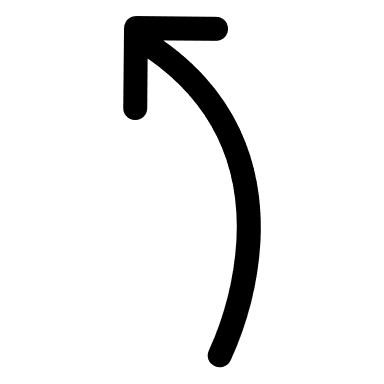3.6107 eV** | **­­- - - - - - - - - - - - - - - - - - - -** | **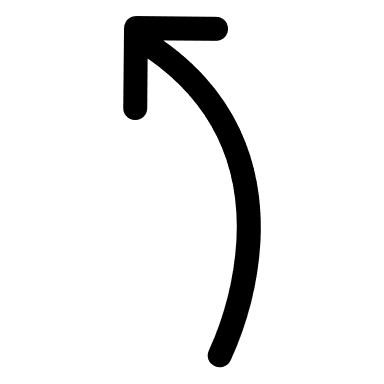3.1916 eV** |
| 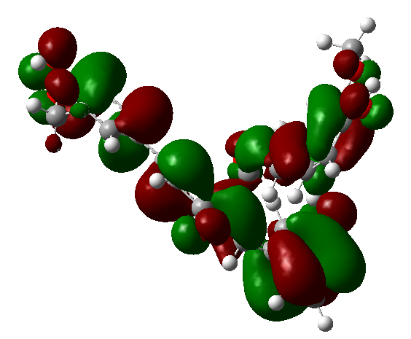 | HOMO  –5.9781 eV | 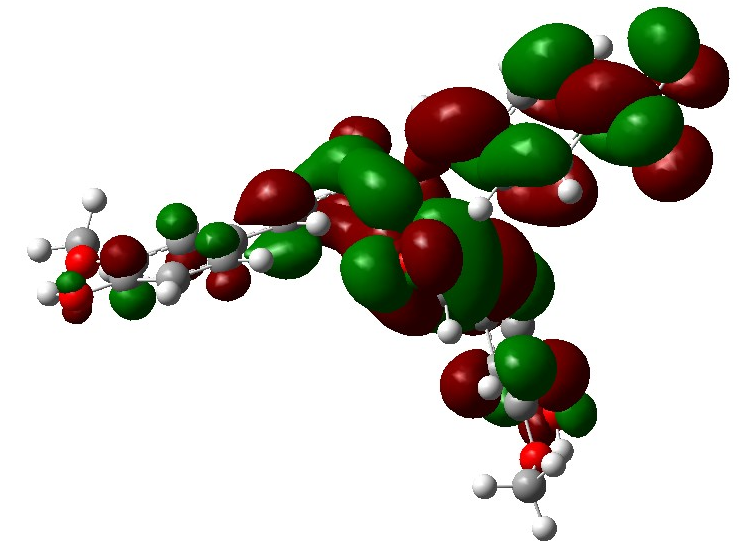 | HOMO  –6.1465 eV |
| Derivative **6** |  | Derivative **10** |  |
| 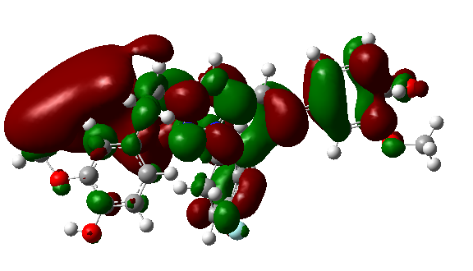 | LUMO  –1.7723 eV | 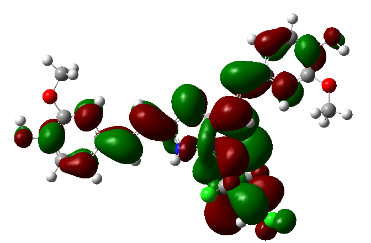 | LUMO  –2.9873 eV |
| **­­- - - - - - - - - - - - - - - - - - - - -** | **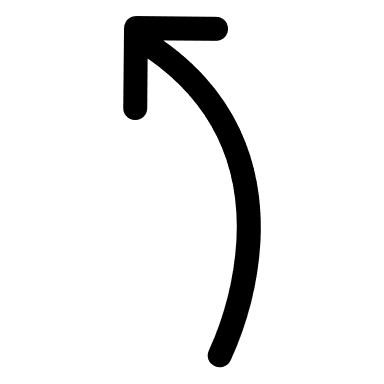1.9813 eV** | **­­- - - - - - - - - - - - - - - - - - - -** | **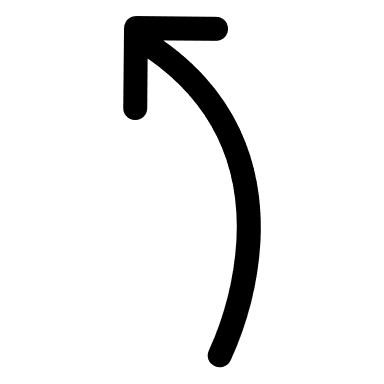2.4977 eV** |
| 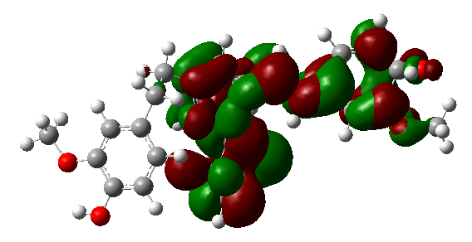 | HOMO  –3.7535 eV | 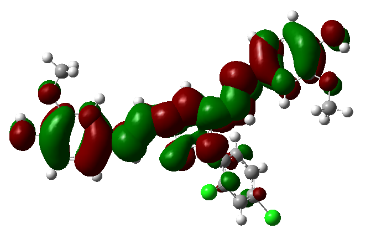 | HOMO  –5.4850 eV |
| Derivative **17** |  | Derivative **18** |  |
| 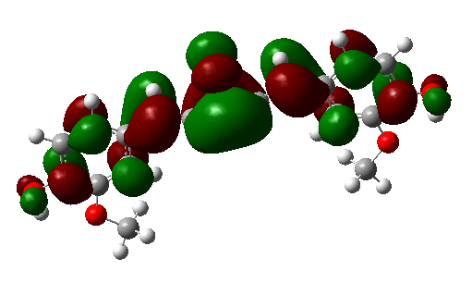 | LUMO  –2.4088 eV | 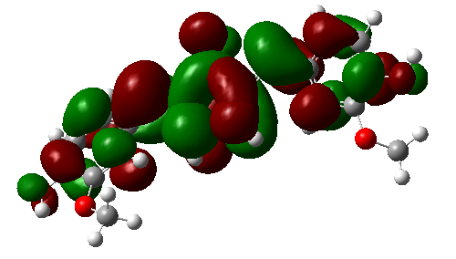 | LUMO  –2.1353 eV |
| **­­- - - - - - - - - - - - - - - - - - - - -** | **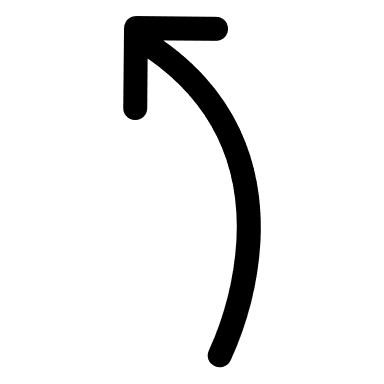3.4175 eV** | **­­- - - - - - - - - - - - - - - - - - - -** | **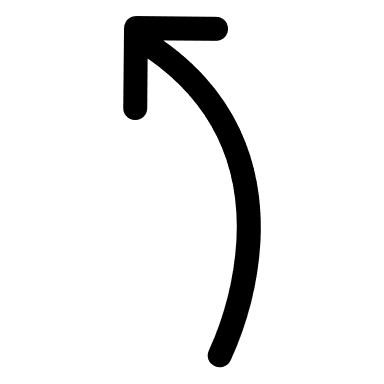3.3046 eV** |
| 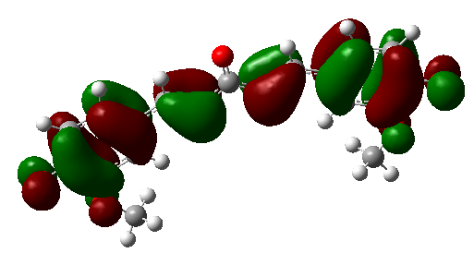 | HOMO  –5.8262 eV | 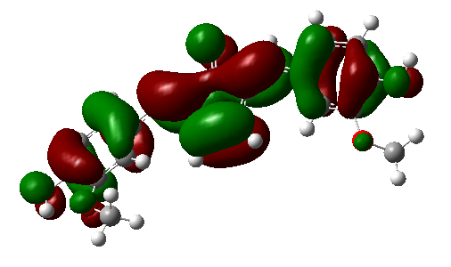 | HOMO  –5.4398 eV |
| Derivative **20** |  | Derivative **21** |  |
| 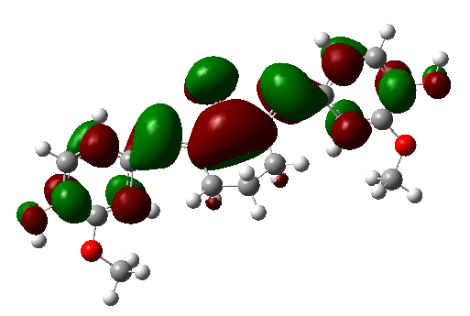 | LUMO  –2.2305 eV |  |  |
| **­­- - - - - - - - - - - - - - - - - - - - -** | **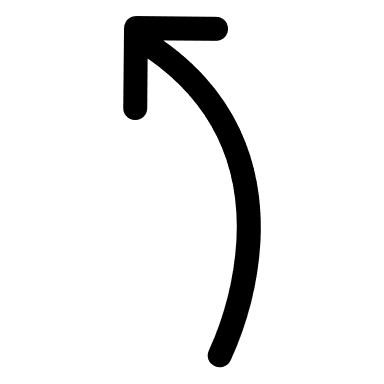3.4556 eV** |  |  |
| 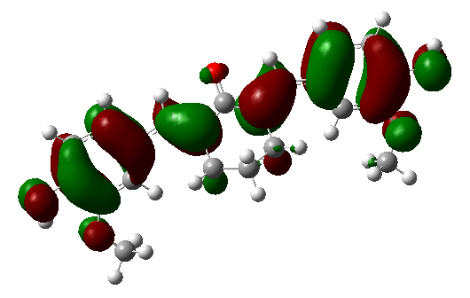 | HOMO  –5.6861 eV |  |  |
| Derivative **22** |  |  |  |

**Figure S2.** Frontier molecular orbitals (FMOs) which illustrate the HOMO-LUMO energy gap for curcumin and the derivatives compounds.

**Scheme S1.** Reaction mechanism of **Scheme 1**.

**Scheme S2.** Reaction mechanism of **Scheme 2**.

**Scheme S3.** Reaction mechanism of **Scheme 3**.

Derivative **2** – (1E,6E)-4-benzylidene-1,7-bis(4-hydroxy-3-methoxyphenyl)hepta-1,6-diene-3,5-dione


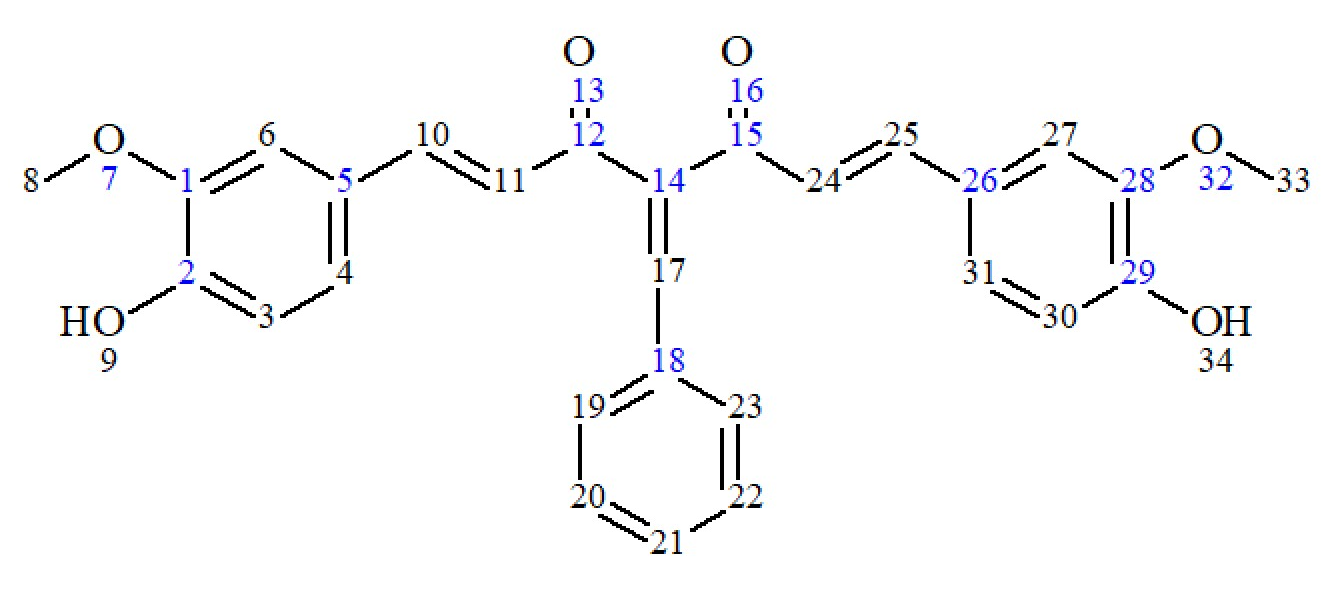


71% (bright orange crystals), m.p.: 190–192 ℃; 1H-NMR (400 MHz, CDCl3, 7.26 ppm) δ (ppm): 3.886–3.931 (2s, 6H, CH3 (8, 33)), 5.904 (s, 2H, OH (9, 34)), 6.746–6.788, 6.860–6.908 (2d, J=16.03 Hz, 2H, C=CH (11, 24)), 6.881–6. 929, 6.937–6.976 (2d, J=8.24 Hz, 2H, Ar–H (3, 30)), 6.952–6.956, 7.043–7.47 (2d, J=1.80 Hz, 2H, Ar–H (6, 27)), 7.001–7.026, 7.156–7.181 (2dd, J=1.8, 8.2 Hz, 2H, Ar–H (4, 31)), 7.322– 7.338 (m, 3H (20, 21, 22)), 7.432–7.473, 7.746–7.785 (2d, 16.0 Hz, 2H (10, 25)), 7.480–7.504 (m, 2H, Ar–H (19, 23)), 7.85 (s, 1 H, C=CH (17)).


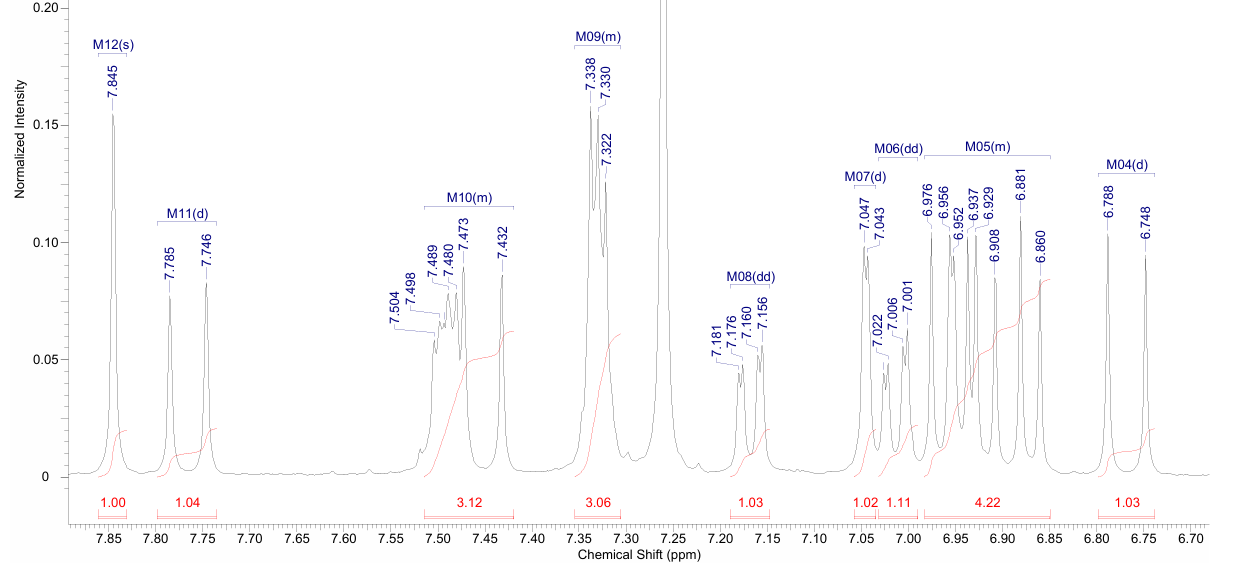


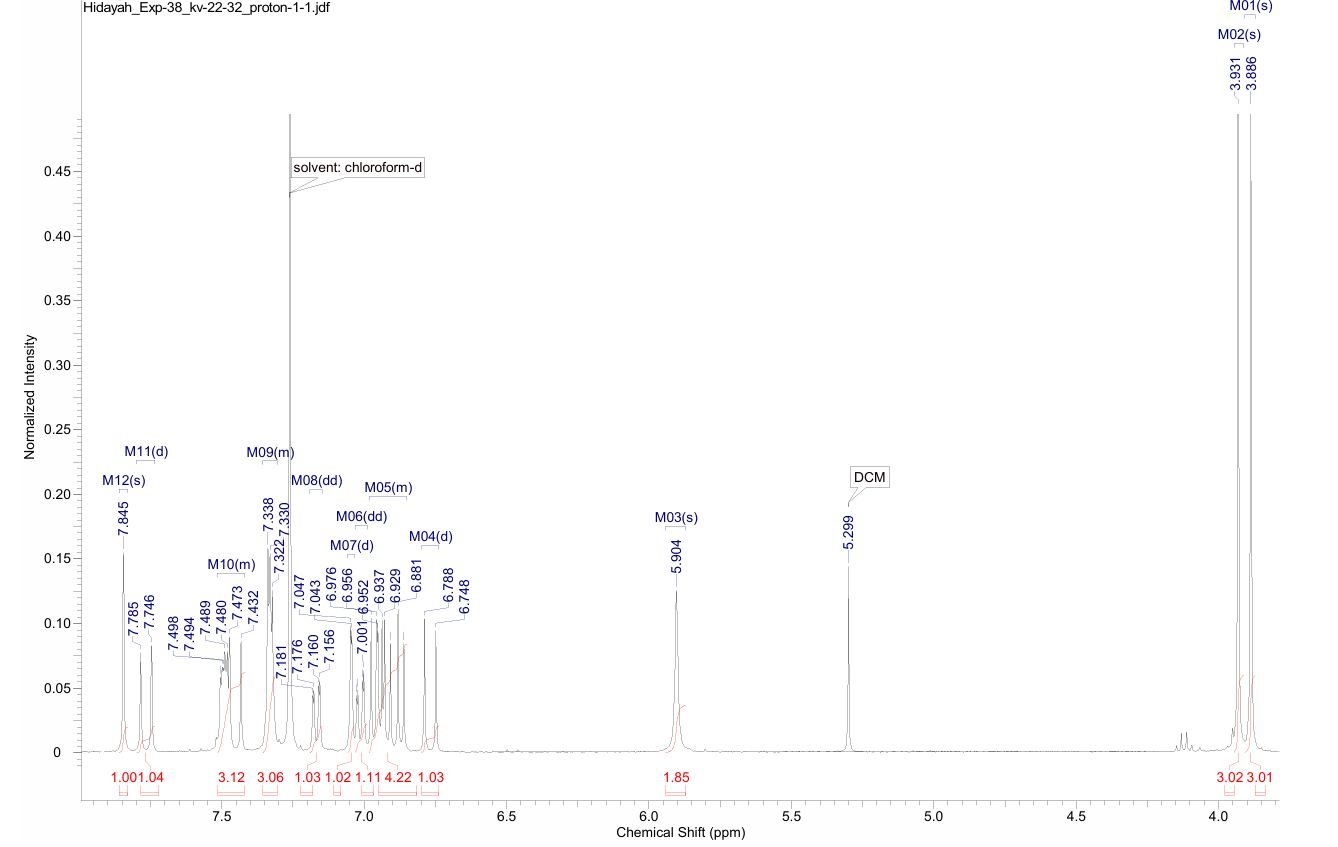


**Figure S3.** 1H NMR data for the synthesised derivative **2**.

Derivative **3** – (1E,6E)-1,7-bis(4-hydroxy-3-methoxyphenyl)-4-(4-hydroxybenzylidene)hepta-1,6-diene-3,5-dione


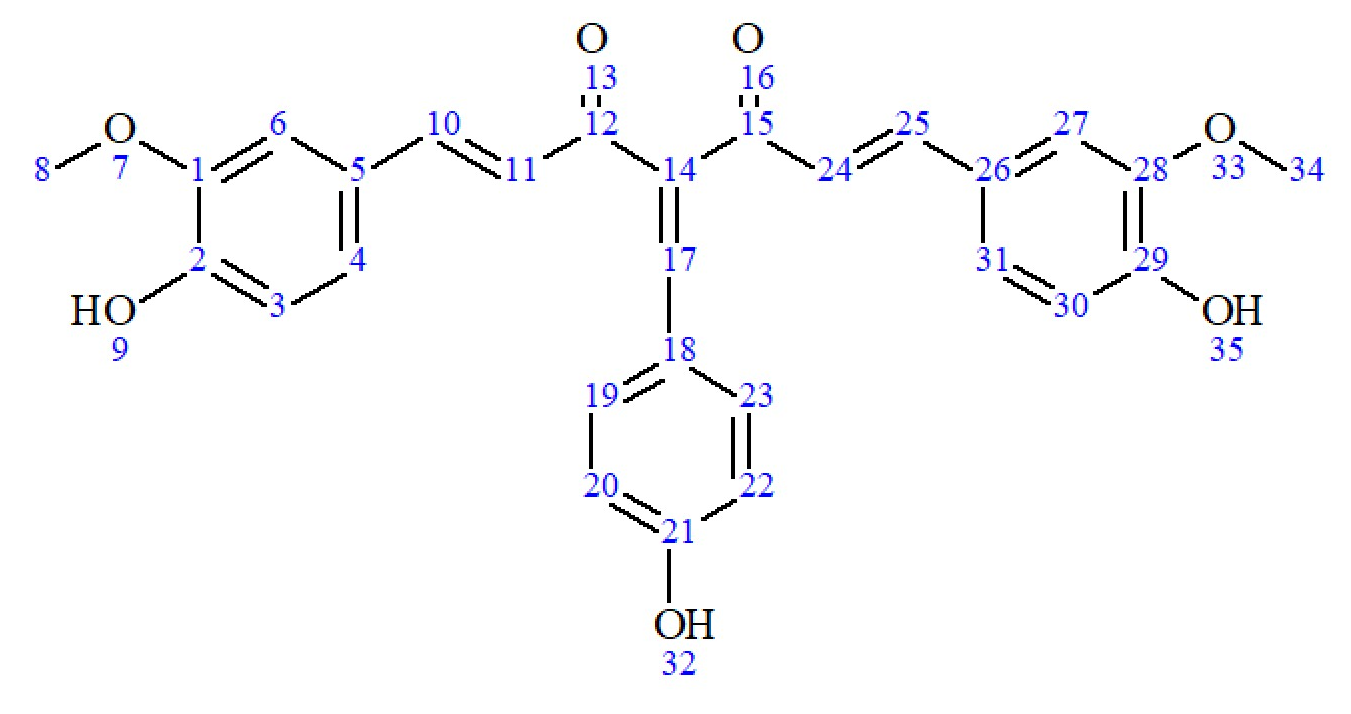


63% (bright orange crystals), m.p.: 242–243 ℃; 1H-NMR (400 MHz, CDCl3, 7.26 ppm) δ (ppm): 3.891–3.924 (2s, 6H, CH3 (8, 34)), 5.654 (s, 1H, OH (32)), 5.905-5.922 (2s, 2H, OH (9, 35)), 6.763–6.785, 6.900–6.922 (2d, J=8.7 Hz, 2H, Ar–H (3, 30)), 6.775–6.818 (2d, J=16.03 Hz, 2H, C=CH (11, 24)), 6.866–6.921 (2d, J=8.24, 2H, Ar–H (6, 27)), 6.960–7.034 (2d, J=5.5 Hz, 2H, Ar–H (20, 22)), 7.022–7.166 (2dd, J=1.8, 8.2 Hz, 2H, Ar–H (4, 31)), 7.386–7.408 (d, J=16 Hz, 2H, Ar–H (19, 23)), 7.452–7.762 (2d, J=16 Hz, 2H, C=CH (10, 25)), 7.801 (s, 1H, C=CH (17)).


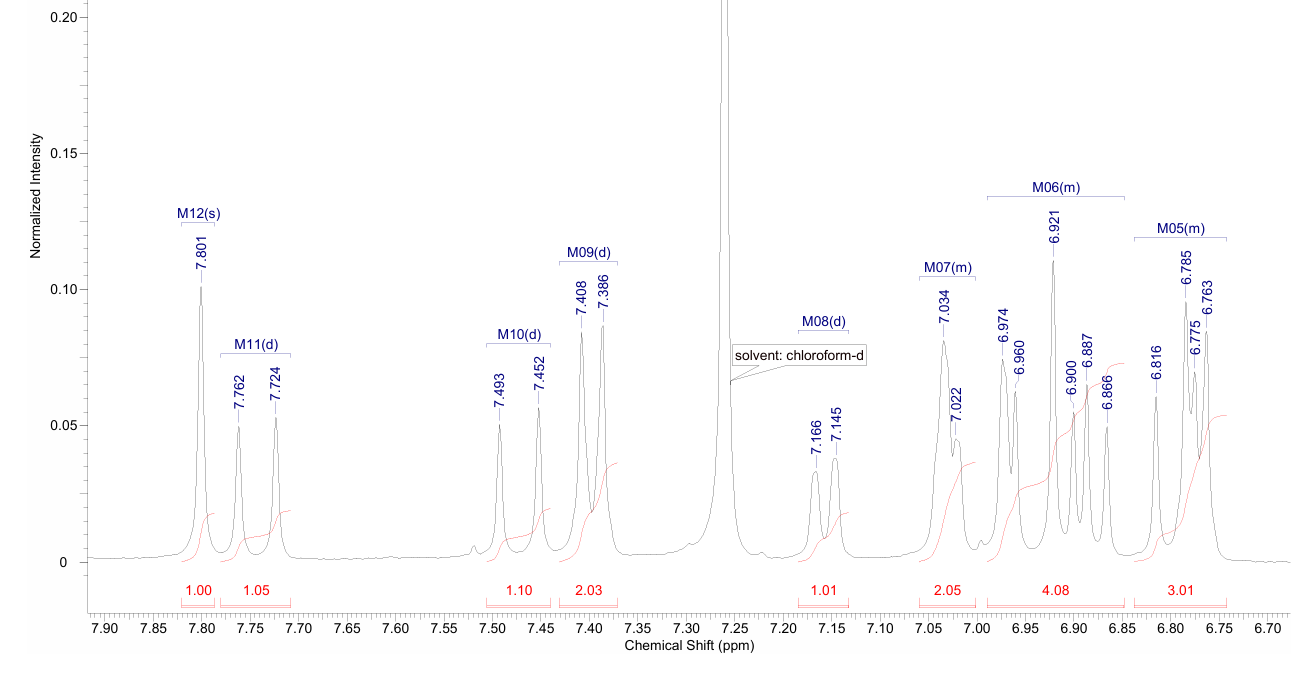


**
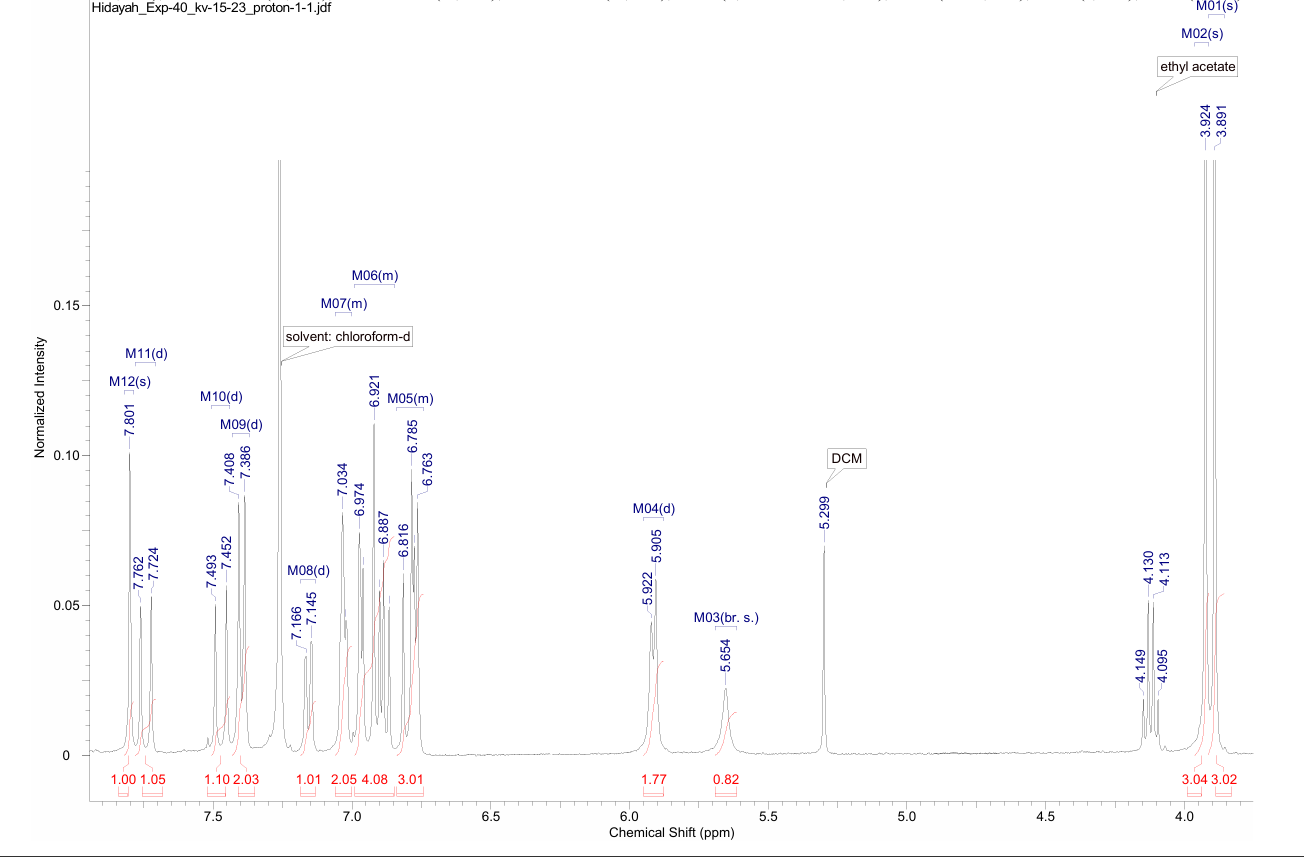
**

**Figure S4.** 1H NMR data for the synthesised derivative **3**.

Derivative **4** – (1E,6E)-4-(4-hydroxy-3-methoxybenzylidene)-1,7-bis(4-hydroxy-3-methoxyphenyl)hepta-1,6-diene-3,5-dione


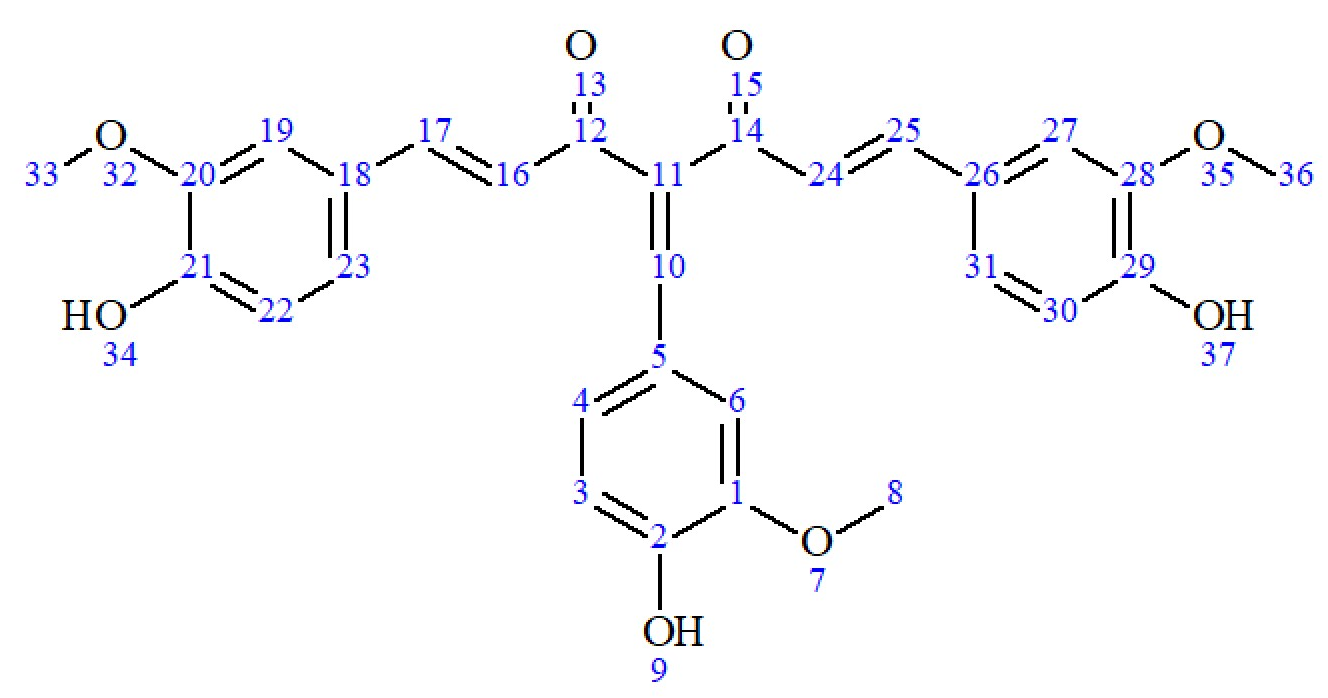


70% (bright orange crystals), m.p.: 231–233 ℃; 1H-NMR (400 MHz, CDCl3, 7.26 ppm) δ (ppm): 3.831 (s, 3H, CH3 (8)), 3.892–3.928 (2s, 6H, CH3 (33, 36)), 5.857 (s, 1H, OH (9)), 5.896–5.909 (2s, 2H, OH, (34, 37)), 6.778–6.818, 6.865–6.905 (2d, J = 16.03 Hz, 2H, C=CH (16, 24)), 6.885–6.891, 6.925–6.931 (2d, 2H 2.29 Hz, Ar–H (22, 30)), 6.871 –6.969 (m, 2H, Ar–H (19, 27)), 7.024–7.039 (m, 3H, Ar–H (3, 4, 6)), 7.077 –7.175 (2dd, 1.37, 8.24 Hz, 2H, Ar–H (23, 31)), 7.468–7.764 (2d, 16 Hz, 2H, C=CH (17, 25)), 7.794 (s, 1H, C=CH (10)).


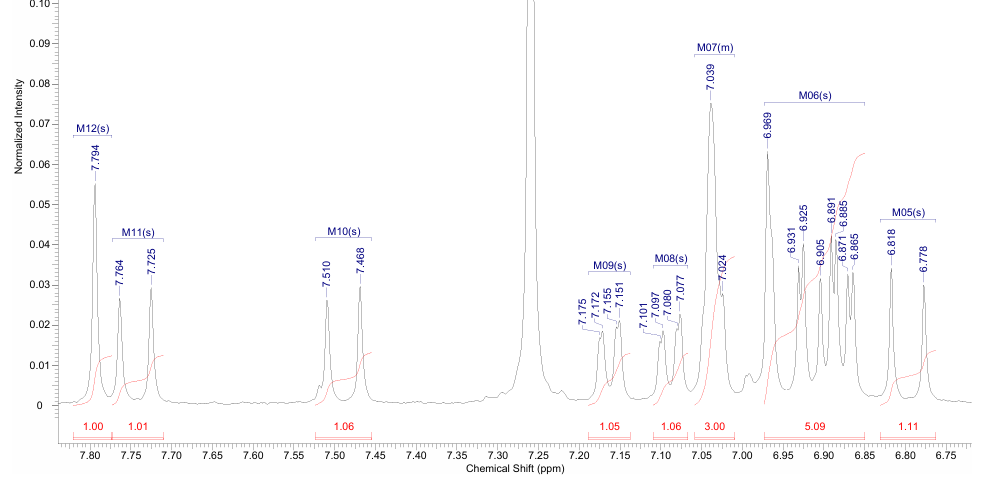


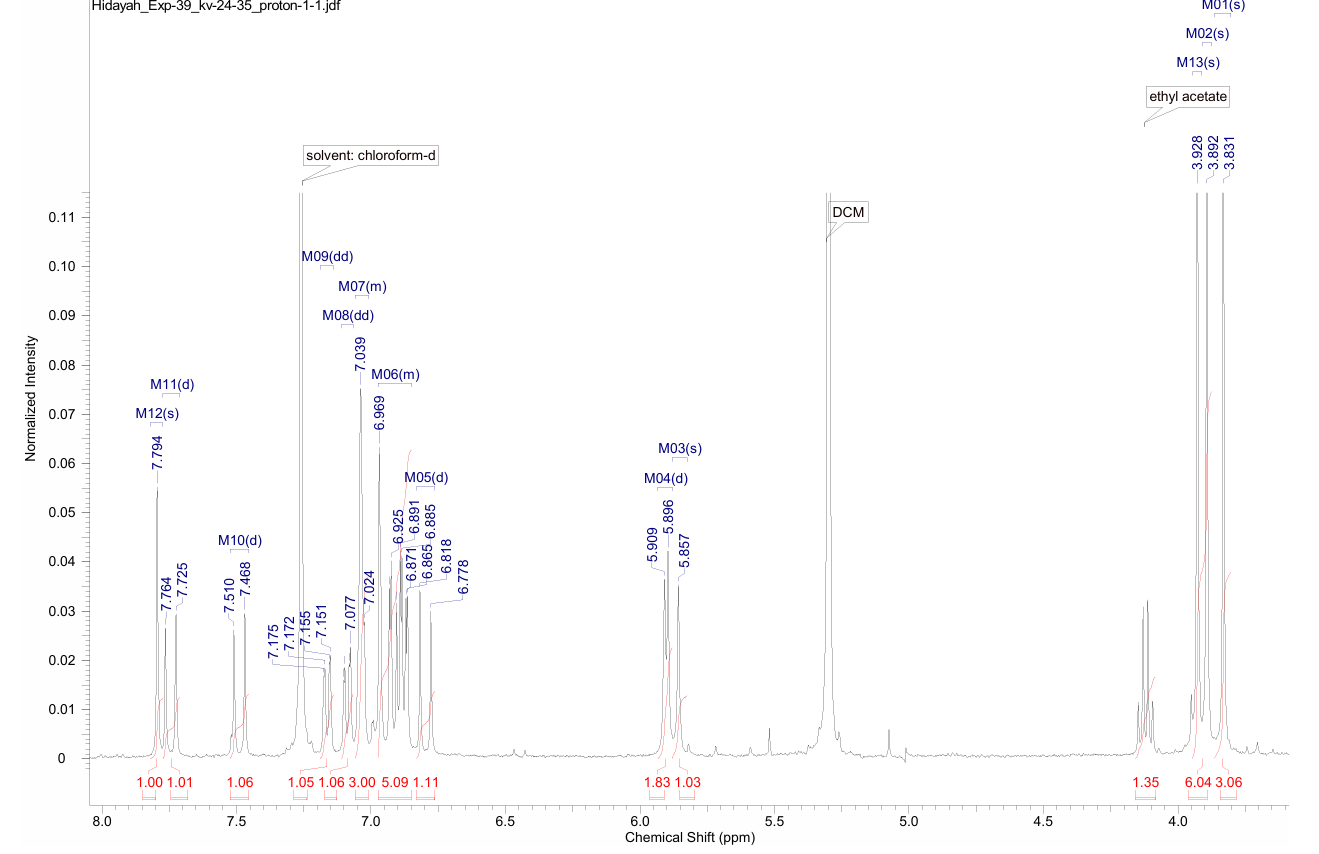


**Figure S5.** 1H NMR data for the synthesised derivative **4**.

Derivative **6** – (1E,6E)-1,7-bis(4-hydroxy-3-methoxyphenyl)-4-(3-hydroxybenzylidene)hepta-1,6-diene-3,5-dione


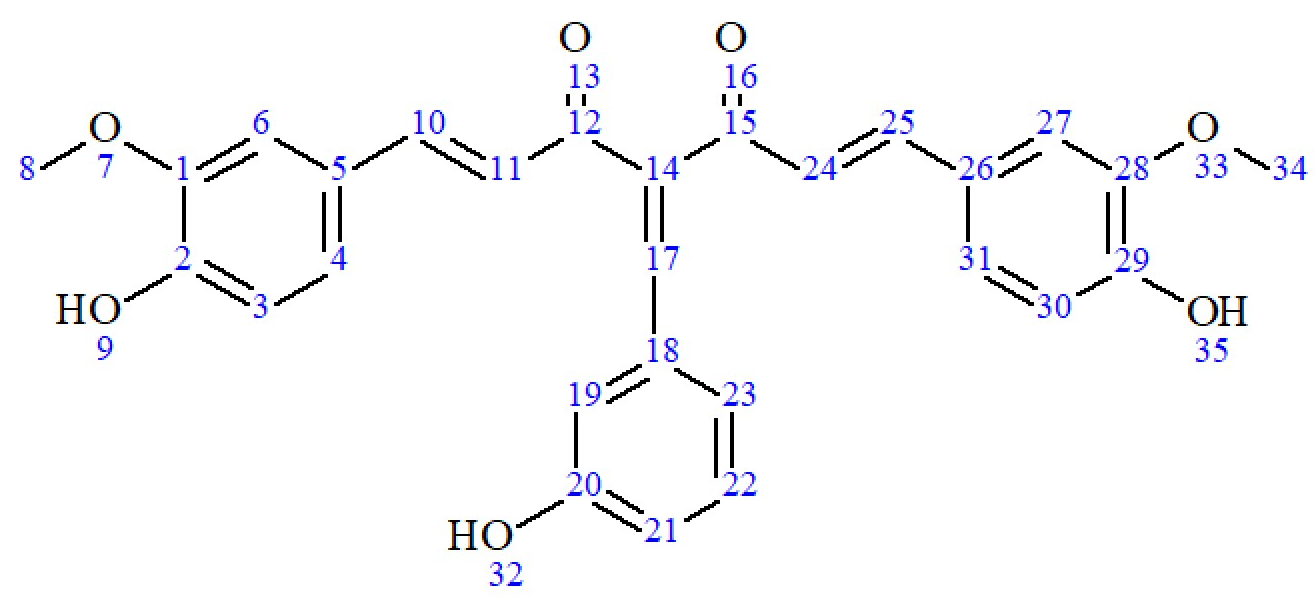


67% (bright orange crystals) , m.p.: 224–226 ℃; 1H-NMR (400 MHz, CDCl3, 7.26 ppm) δ (ppm): 3.877–3.924 (2s, 6H, CH3 (8, 34)), 5.653 (s, 1H, OH (32)), 5.937 (s, 2H, OH (9, 35)), 6.743–6.783, 6.903–6.945 (2d, J=16 Hz, 2H, C=CH (11, 24)), 6.810–6.835 (dd, J=2.1, 8 Hz, 1H, Ar–H (21)), 6.853–6.923 (2d, J=8.24 Hz, 2H, Ar–H (6, 27)), 6.950–6.96, 7.024–7.054 (2d, J=4.58 Hz, 2H, Ar–H (3, 30)), 6.979 (m, 1H, Ar–H (22)), 6.994–7.019, 7.147–7.176 (2dd, J=1.83, 8.24 Hz, 2H, Ar–H (4, 31)), 7.038 (m, 1H, Ar–H (19)), 7.196–7.215 (d, J=8.24 Hz, 1H, Ar–H (23)), 7.422–7.781 (2d, J=16 Hz, 2H, C=CH (10, 25)), 7.781 (s, 1H, C=CH (17)).


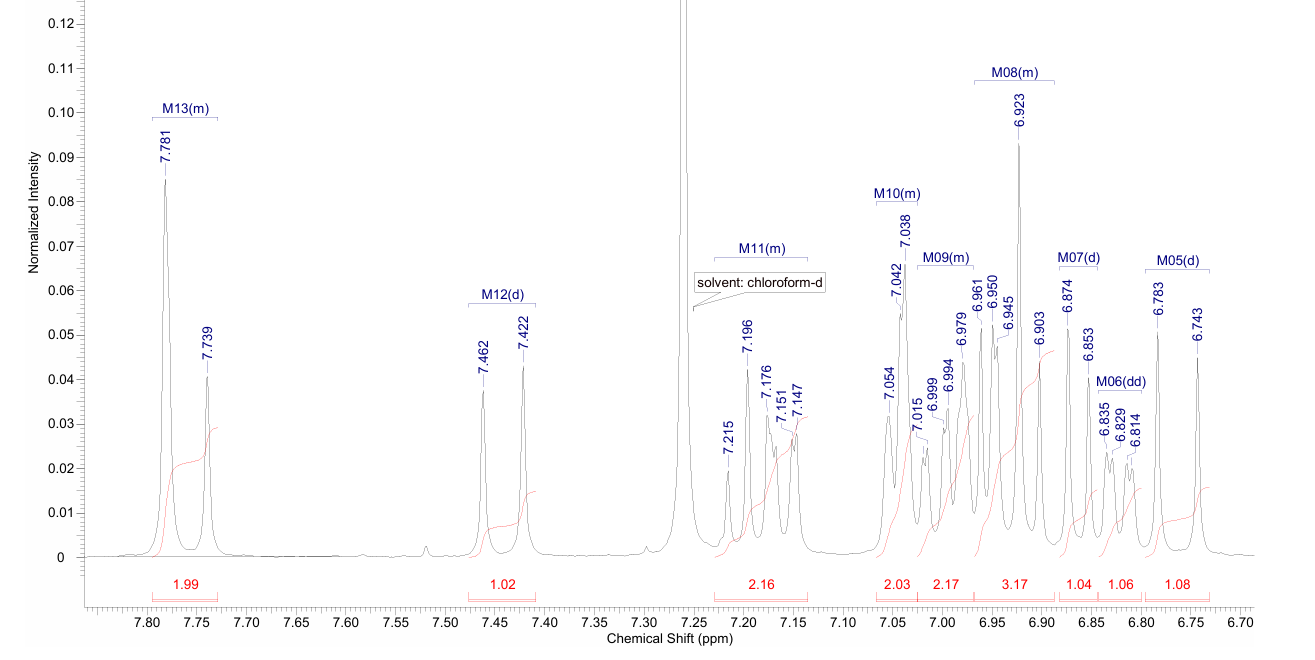


**
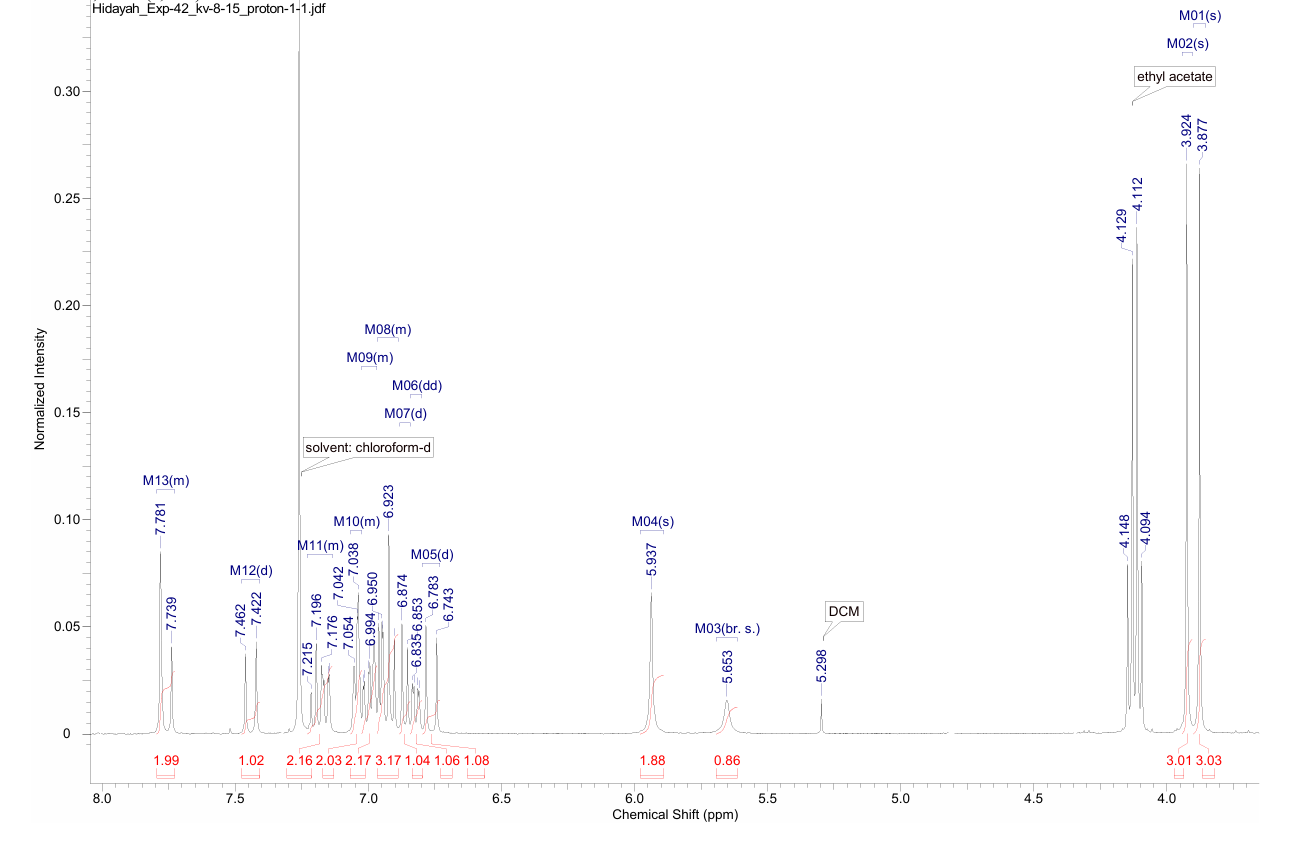
**

**Figure S6.** 1H NMR data for the synthesised derivative **6**.

Derivative **10** – (1E,6E)-1,7-bis(4-hydroxy-3-methoxyphenyl)-4-(4-nitrobenzylidene)hepta-1,6-diene-3,5-dione


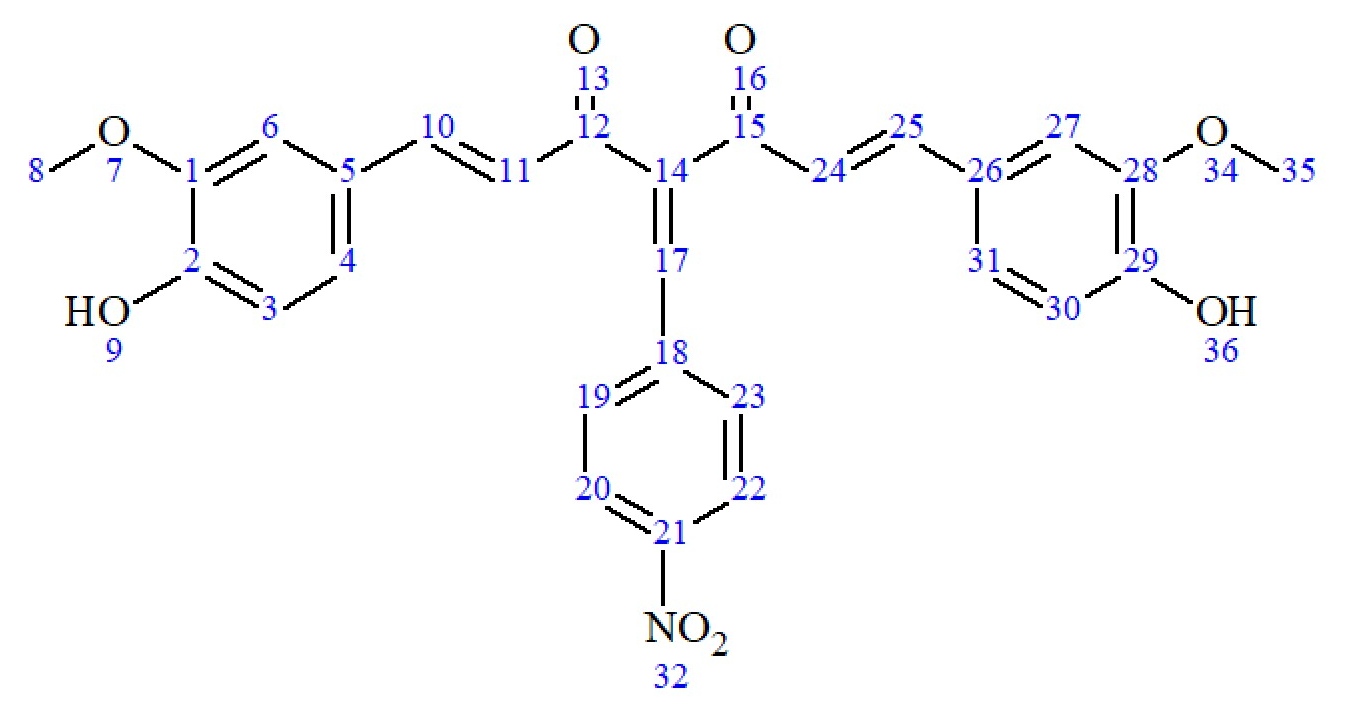


79% (bright orange crystals), m.p.: 244–245 ℃; 1H-NMR (400 MHz, CDCl3, 7.26 ppm) δ (ppm): 3.873–3.904 (2s, 6H, CH3 (8, 35)), 6.110 (s, 2H, OH (9, 36)), 6.746–6.786, 6.873–6.913 (2d, J=16 Hz, 2H, C=CH (11, 24)), 6.853–6.929 (2d, J=7.8 Hz, 2H, Ar–H (6, 27)), 6.959–7.023 (d, J=11 Hz, 2H, Ar–H (3, 30)), 6.995–7.161 (2dd, J=7.8 Hz, Ar–H (4, 31)), 7.409–7.627, 7.770–7.808 (2d, J=16 Hz, 2H, 10, 25)), 7.605–7.627 (d, J=8.7 Hz, 2H, Ar–H (19, 23)), 7.796 (s, 1H (17)), 8.135–8.157 (d, J=8.7 Hz, 2H, Ar–H (20, 22)).


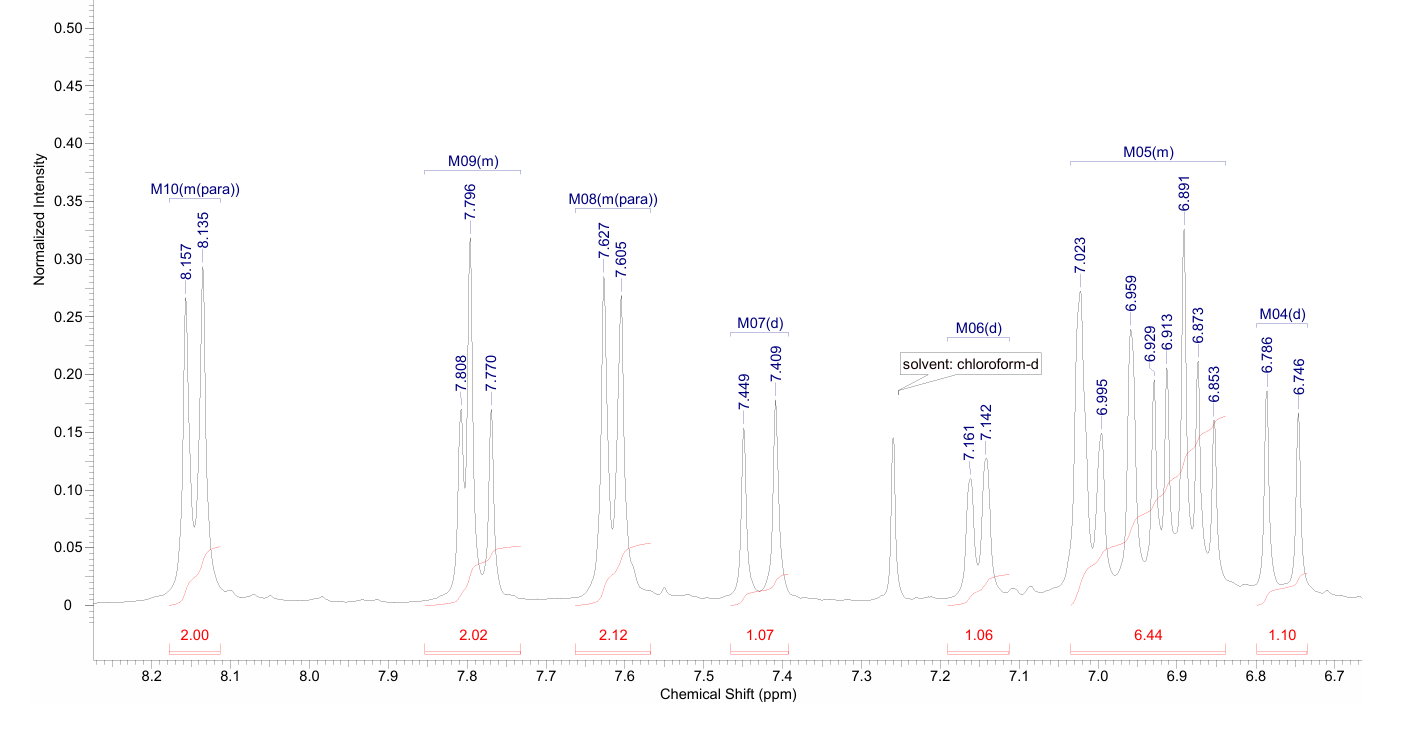


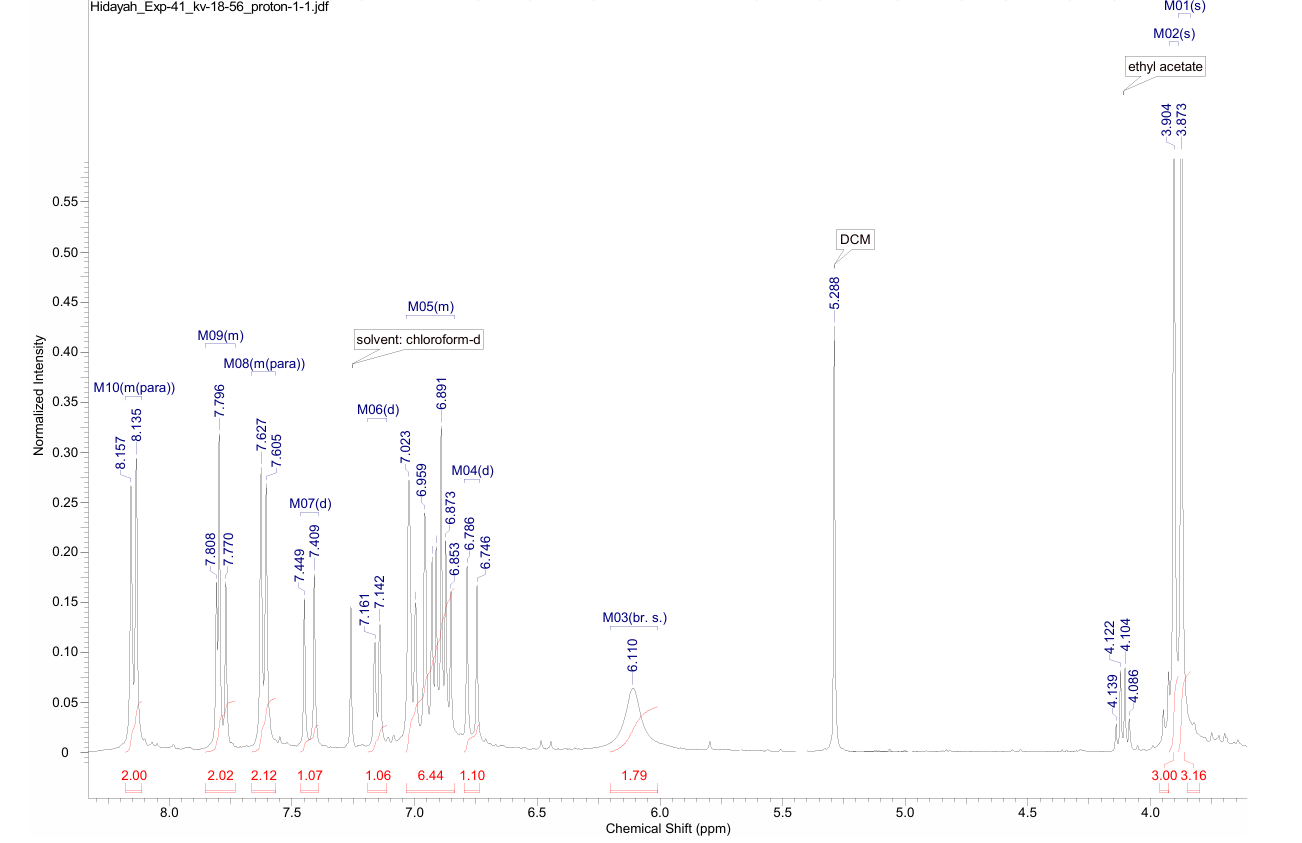


**Figure S7.** 1H NMR data for the synthesised derivative **10**.

Derivative **17** – 4,4'-((1E,1'E)-(1-(3-nitrophenyl)-1H-pyrazole-3,5-diyl)bis(ethene-2,1-diyl))bis(2-methoxyphenol)


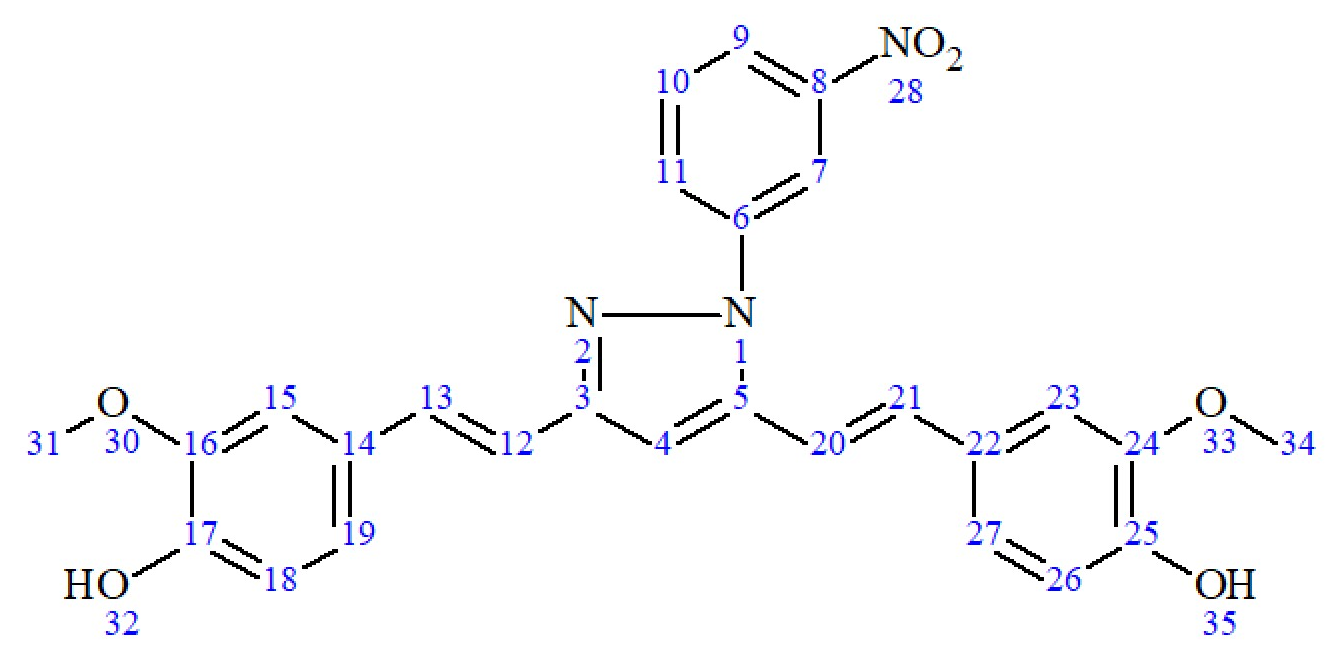


65% (brown solids), m.p.: 225–227 ℃; 1H-NMR (400 MHz, CDCl3, 7.26 ppm) δ (ppm): 3.912–3.945 (2s, 6H, CH3 (31, 34)), 6.689–6.729 (d, J=16.1 Hz, 1H, C=CH (12)), 6.846 (s, 1H, C=CH (4)), 6.901–6.928 (2d, J=2.45 Hz, 2H, Ar–H (18, 26)), 6.934–6.939 (d, J=1.96 Hz, 1H, C=CH (23)), 6.970–7.039 (2dd, J=8.31, 1.96 Hz, 2H, Ar–H (19, 27)), 6.992–7.034 (d, J=16.1 Hz, 1H, Ar–H (20)),7.095–7.100 (d, J=1.96 Hz, 1H, Ar–H (15)), 7.105–7.192 (2d, J=16.4 Hz, 2H, C=CH (13, 21)), 7.670–7.711 (t, J=8.2, 1H, Ar–H (11)), 7.919–7.946 (ddd, J=8.1, 2.1, 0.9 Hz, 1H, Ar–H (9)), 8.238–8.264 (dt, J=8.3, 0.9 Hz, 1H, Ar–H (10)), 8.477–8.488 (t, J=2.1 Hz, 1H, Ar–H (7)).


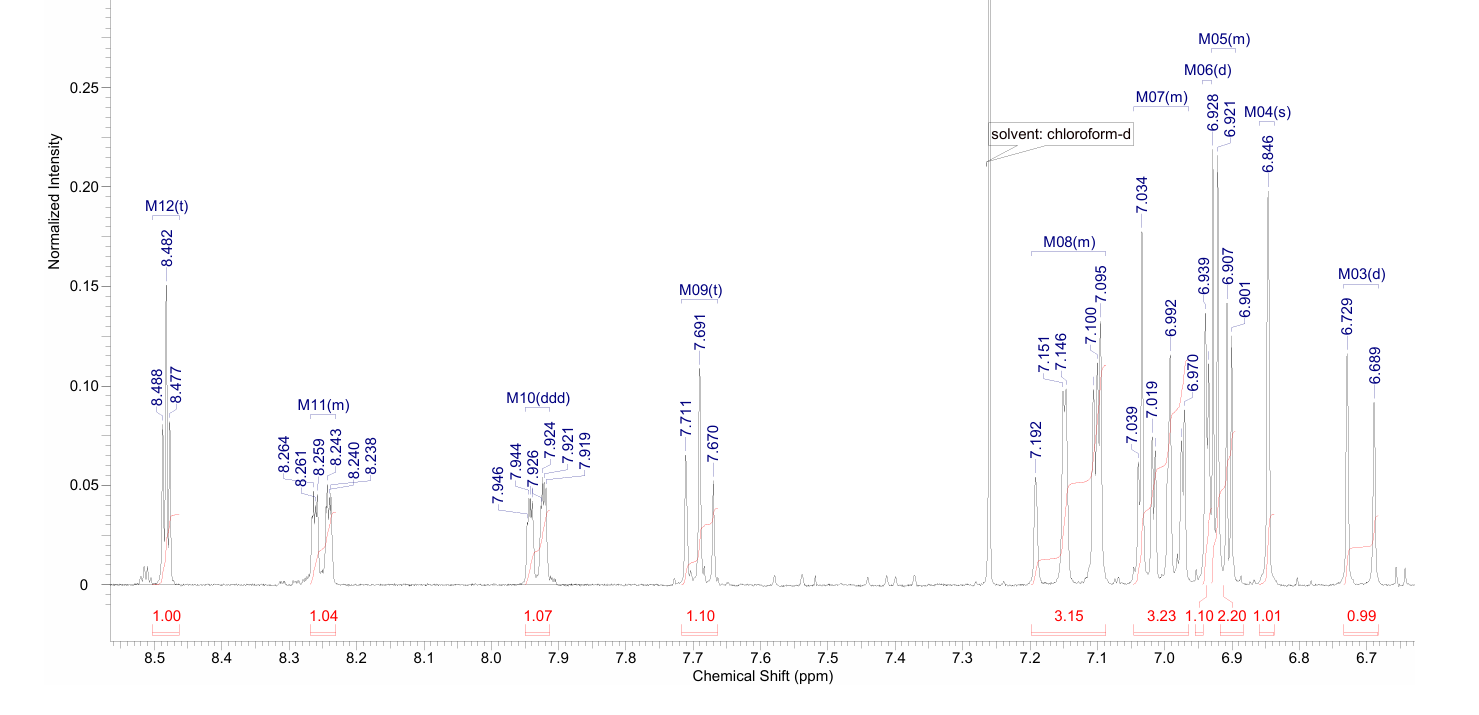


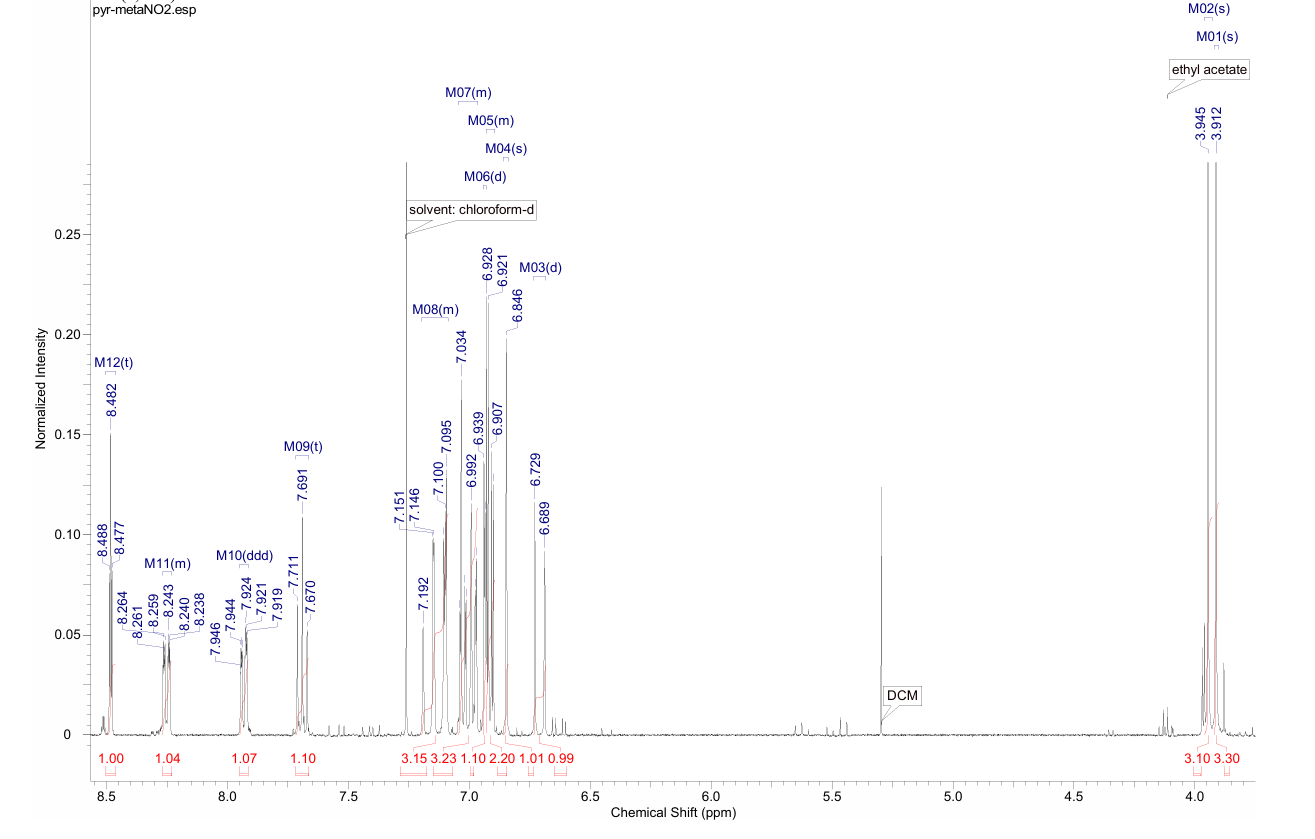


**Figure S8.** 1H NMR data for the synthesised derivative **17**.

Derivative **18** – 4,4'-((1E,1'E)-(1-(2,4-dichlorophenyl)-1H-pyrazole-3,5-diyl)bis(ethene-2,1-diyl))bis(2-methoxyphenol)


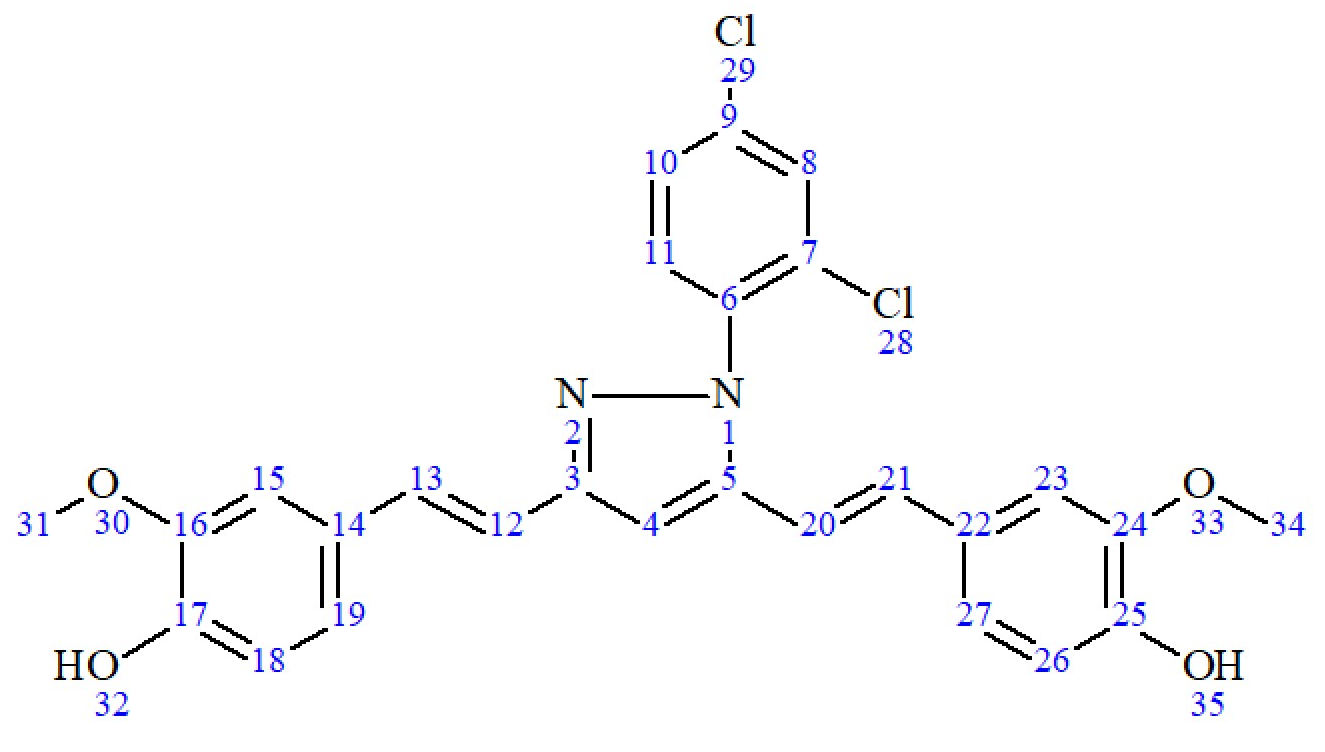


70% (brownish orange solids), m.p.: 209–212 ℃; 1H-NMR (400 MHz, CDCl3, 7.26 ppm) δ (ppm): 3.880–3.897 (2s, 6H, CH­3 (31, 34)), 6.312–6.352 (dd, J=16.14 0.49 Hz, 1H, C=CH (12)), 6.810 (s, 1H, C=CH (4)), 6.837–6.841 (d, J=1.71 Hz, 1H, C=H (20)), 6.857–6.904 (2d, J=11.00 Hz, 2H, Ar–H (18, 26)), 6.910–6.935, 6.983–7.008 (2dd, J=10.27, 1.47 Hz, Ar–H (19, 27)), 6.976–7.042 (2d, J=8.56 Hz, 2H, Ar–H (15, 23)), 7.058–7.063 (d, J=1.96 Hz, 1H, C=CH (13)), 7.122–7.163 (d, J=16 Hz, 1H, C=CH (21)), 7.388–7.415 (dd, J=8.56, 2.45 Hz, 1H, Ar–H (11)), 7.438–7.460 (dd, J=8.07, 0.49 Hz, 1H, Ar–H (10)), 7.584–7.591 (dd, J=2.20, 0.49 Hz, 1H, Ar–H (8)).


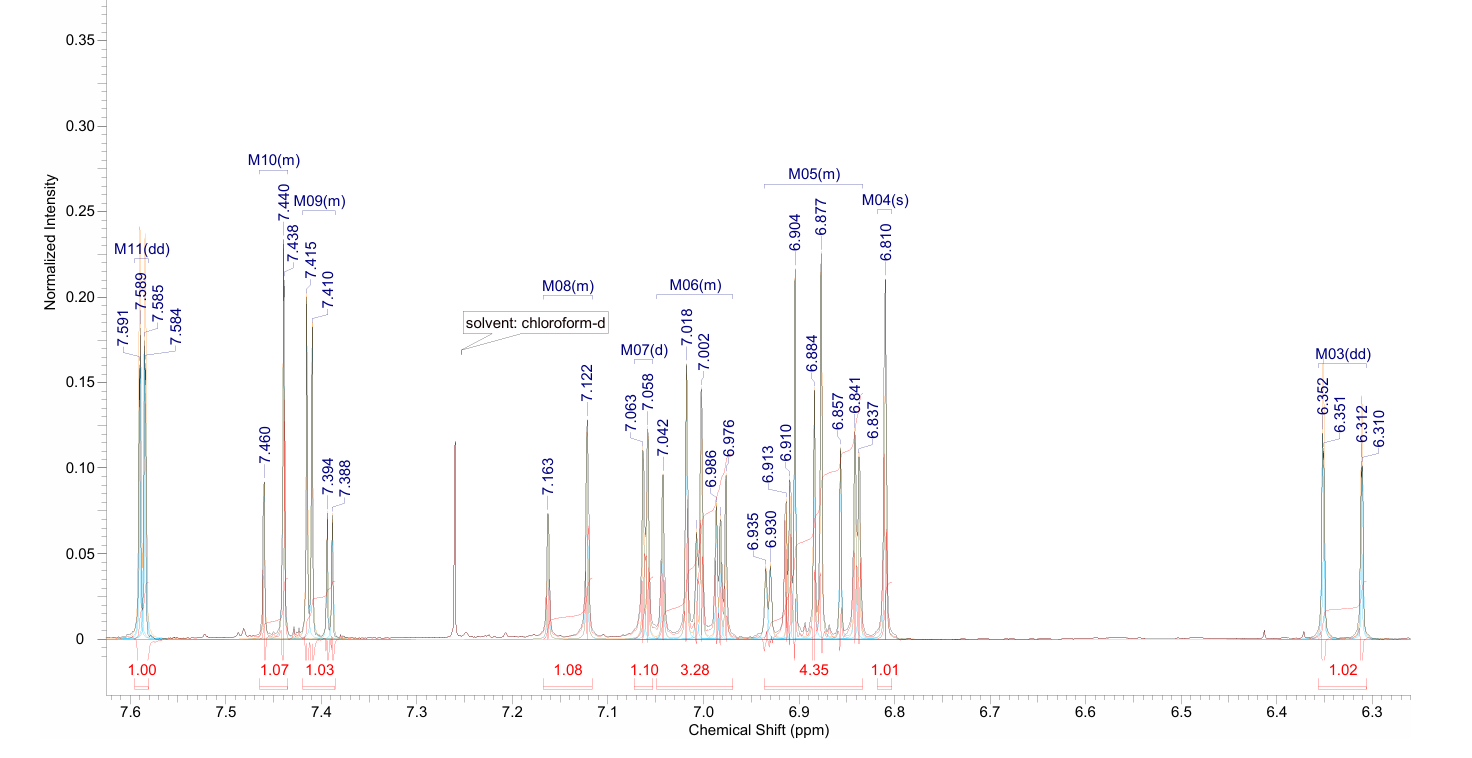


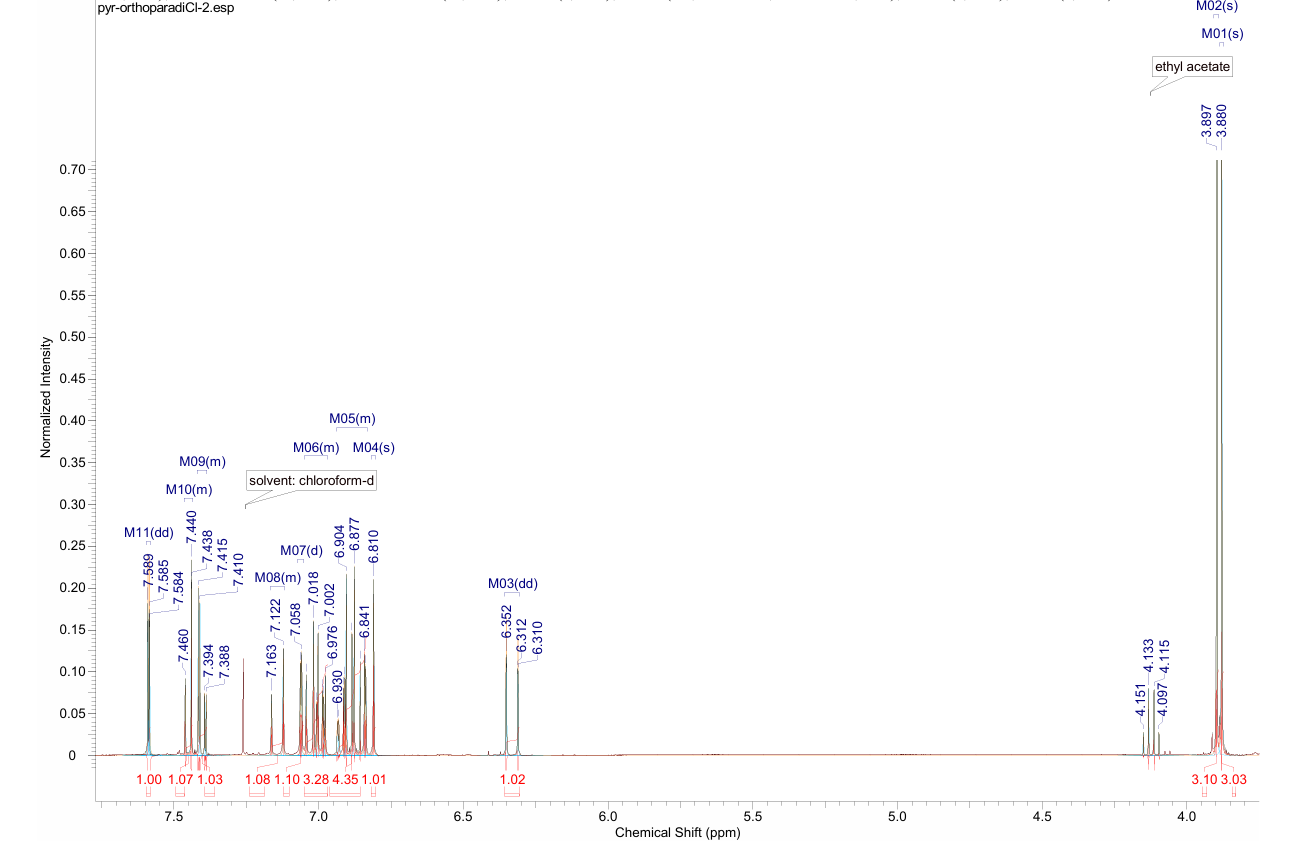


**Figure S9.** 1H NMR data for the synthesised derivative **18**.

Derivative **20** – (1E,4E)-1,5-bis(4-hydroxy-3-methoxyphenyl)penta-1,4-dien-3-one


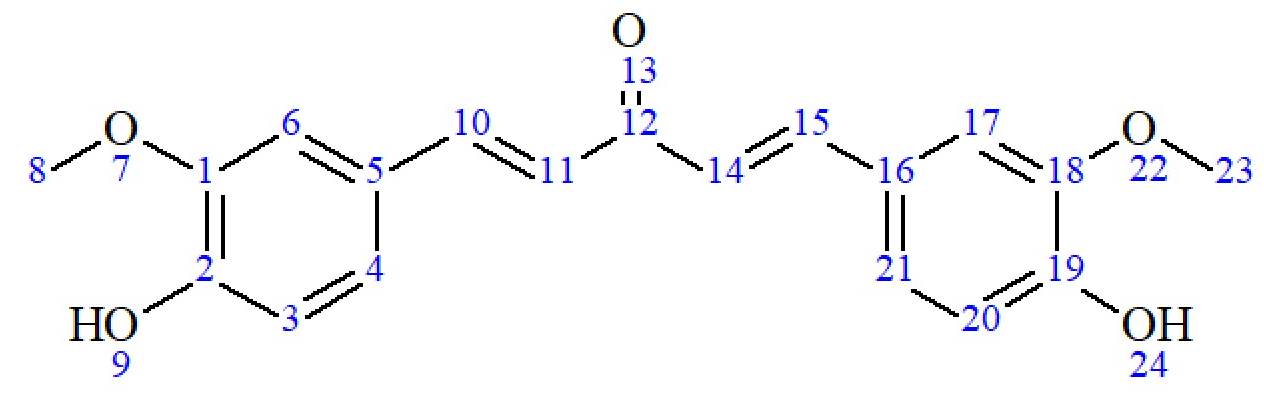


71% (pale yellow solids), m.p.: 212–213 ℃; 1H-NMR (400 MHz, CDCl3, 7.26 ppm) δ (ppm): 3.955 (s, 6H, CH3 (8, 23)), 5.967 (broad s, 2H, OH (9, 24)), 6.913–6.937 (d, J=9.62 Hz, 2H, Ar-H (3,20)), 6.956 (s, 2H, Ar-H (6, 17)), 7.11 (s, 2H, C=CH (11,14)), 7.170 - 7.192 (dd, 2H, Ar-H (4, 21)), 7.65–7.69 (2s, 2H, C=CH (10, 15)).


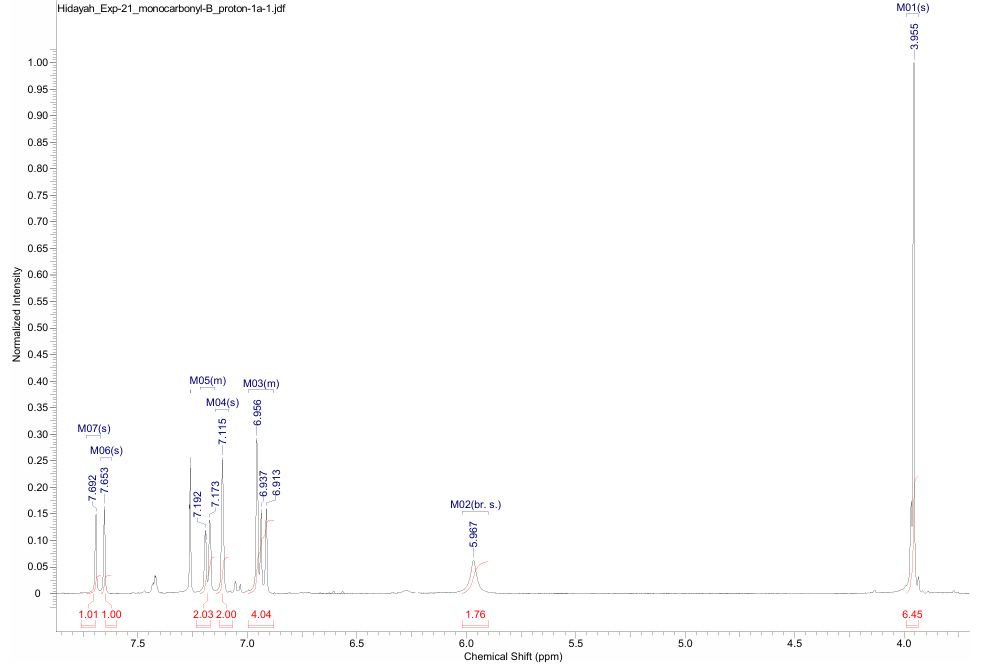


**Figure S10.** 1H NMR data for the synthesised derivative **20**.

Derivative **21** – (2E,5E)-2,5-bis(4-hydroxy-3-methoxybenzylidene)cyclopentanone


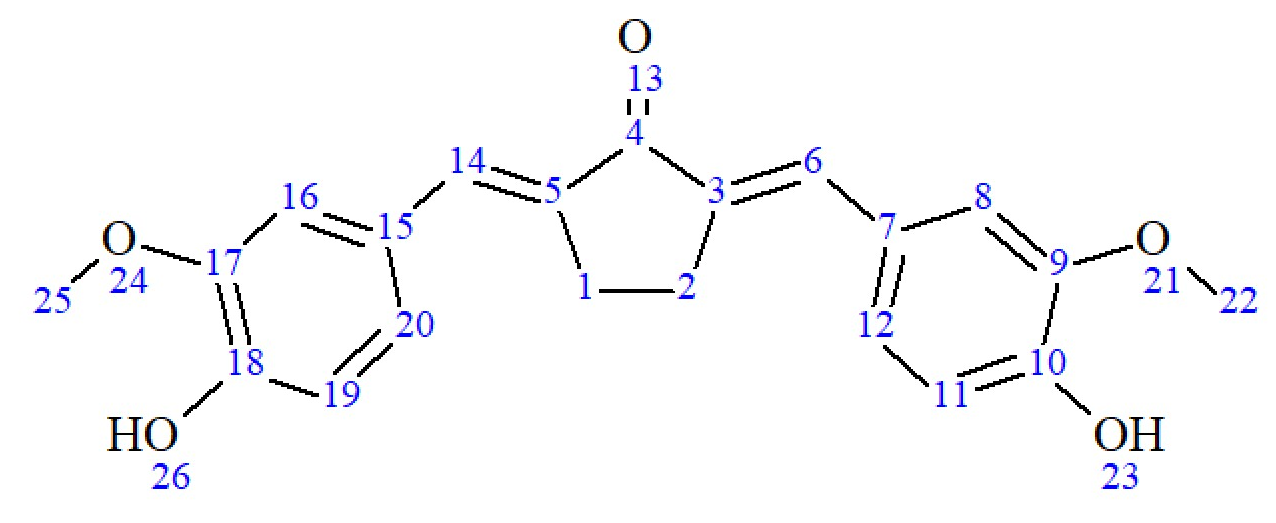


61% (greenish yellow solids), m.p.: 213–215 ℃; 1H-NMR (400 MHz, CDCl3, 7.26 ppm) δ (ppm): 3.093 (s, 4H, CH2 (1, 2)), 3.939 (s, 6H, CH3 (22, 25)), 6.262 (s, 2H, OH (23, 26)), 6.968–6.989 (d, J = 8.24 Hz, 2H, Ar-H (11, 19)), 7.101 (s, 2H, Ar-H (8, 16)), 7.181–7.202 (dd, J = 8.24 Hz, 2H, Ar-H (12, 20)), 7.520 (s, 2H, C=CH (6, 14)).


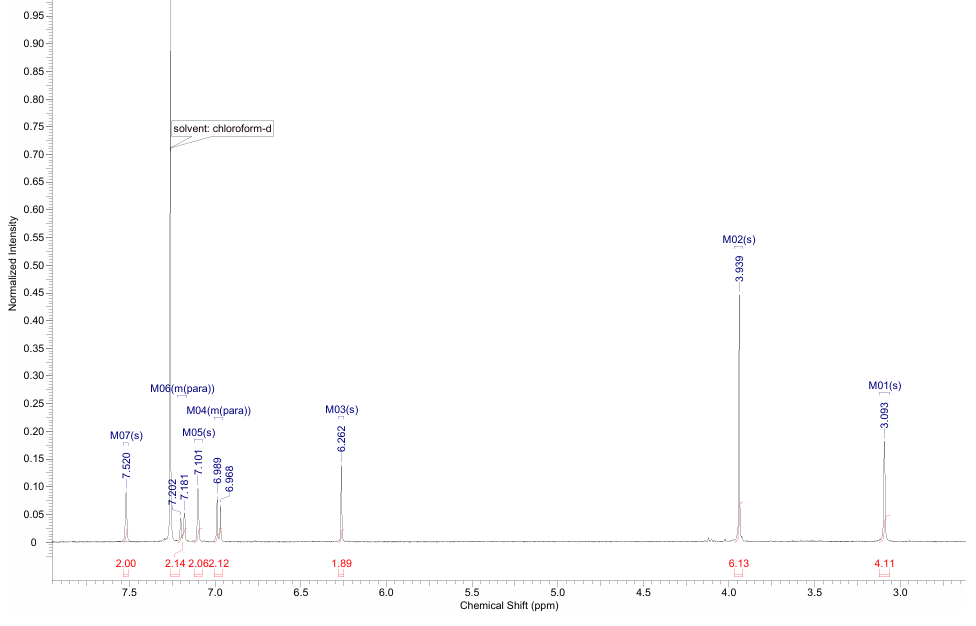


**Figure S11.** 1H NMR data for the synthesised derivative **21**.

Derivative **22** – (2E,6E)-2,6-bis(4-hydroxy-3-methoxybenzylidene)cyclohexanone


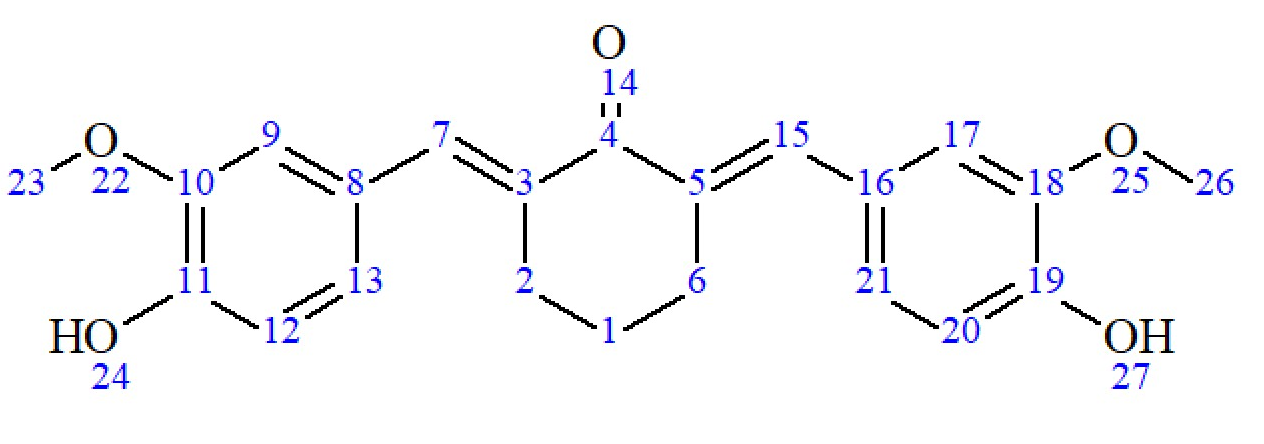


64% (greenish yellow solids), m.p.: 204–205 ℃; 1H-NMR (400 MHz, CDCl3, 7.26 ppm) δ (ppm): 1.782–1.845 (dt, J = 6.35, 12.48 Hz, 2H, CH2 (1)), 2.909–2.946 (m, 4H, CH2 (2, 6)), 3.916 (s, 6H, CH3 (23, 26)), 5.912 (broad s, 2H, OH (24, 27)), 6.939–6.960 (d, J = 8.24 Hz, 2H, Ar-H (9, 17)), 6.987–6.992 (d, J = 1.83 Hz, 2H, Ar-H (12, 20)), 7.061–7.086 (dd, J = 1.83, 8.24 Hz, 2H, Ar-H (13, 21)), 7.74 (s, 2H, C=CH (7, 15))


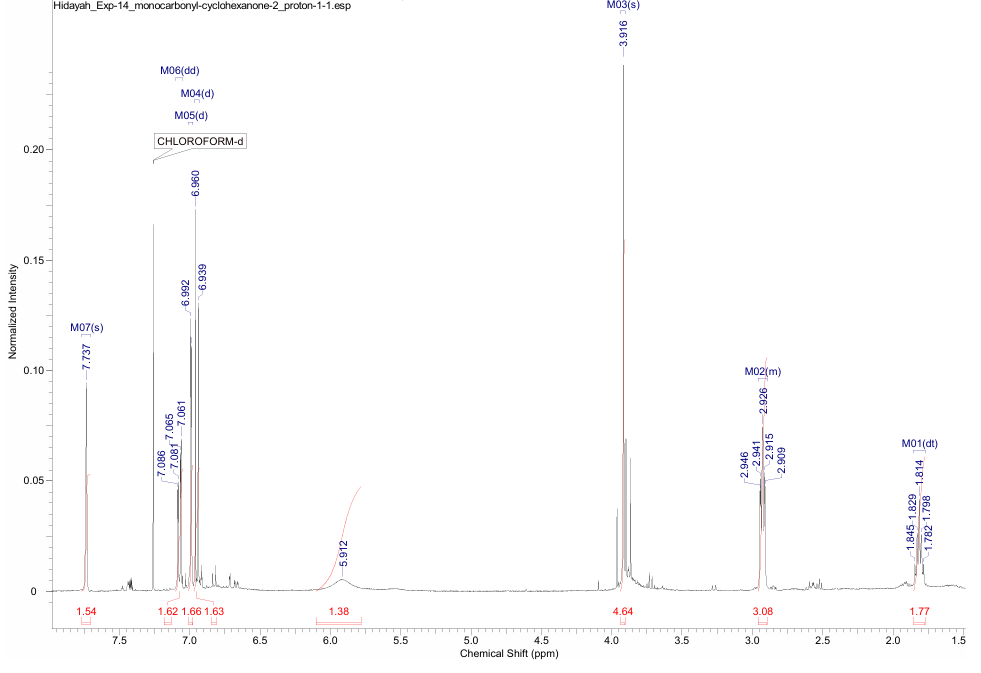


**Figure S12.** 1H NMR data for the synthesised derivative **22**.

**Results from *in vitro* pLDH antiplasmodial assessments**

| **Chloroquine** against 3D7  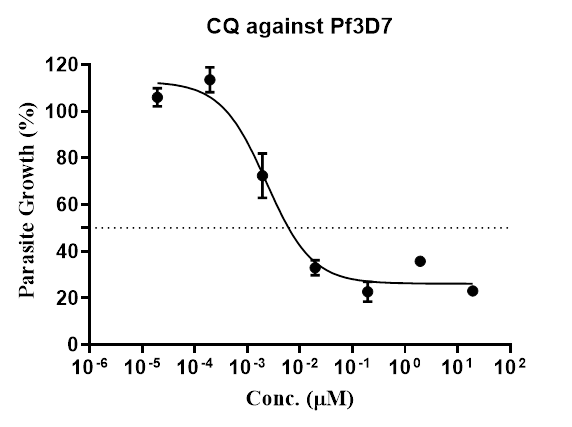 | **Chloroquine** against K1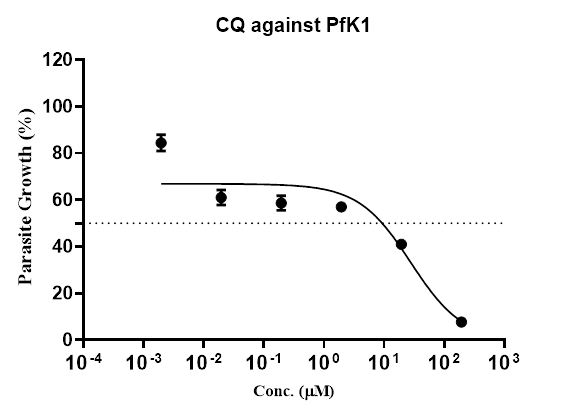 |
| --- | --- |
| **Curcumin** against 3D7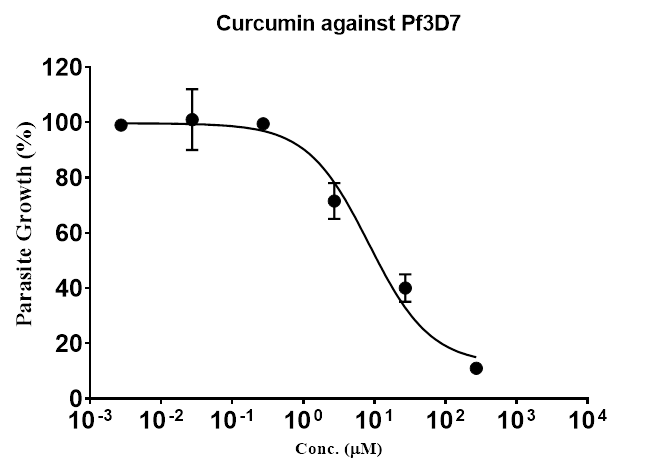 | **Curcumin** against K1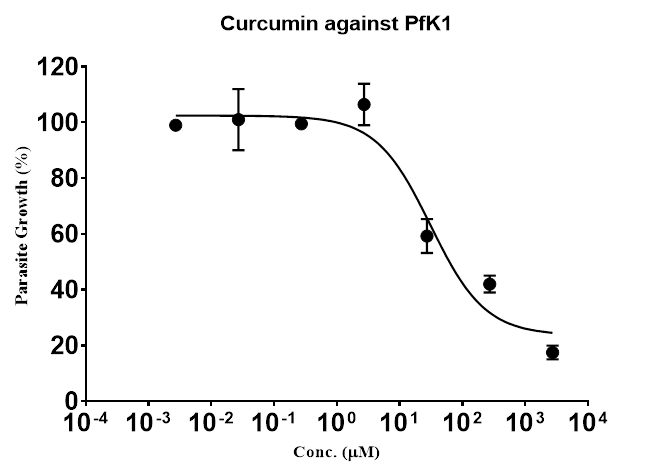 |
| Derivative **2** against 3D7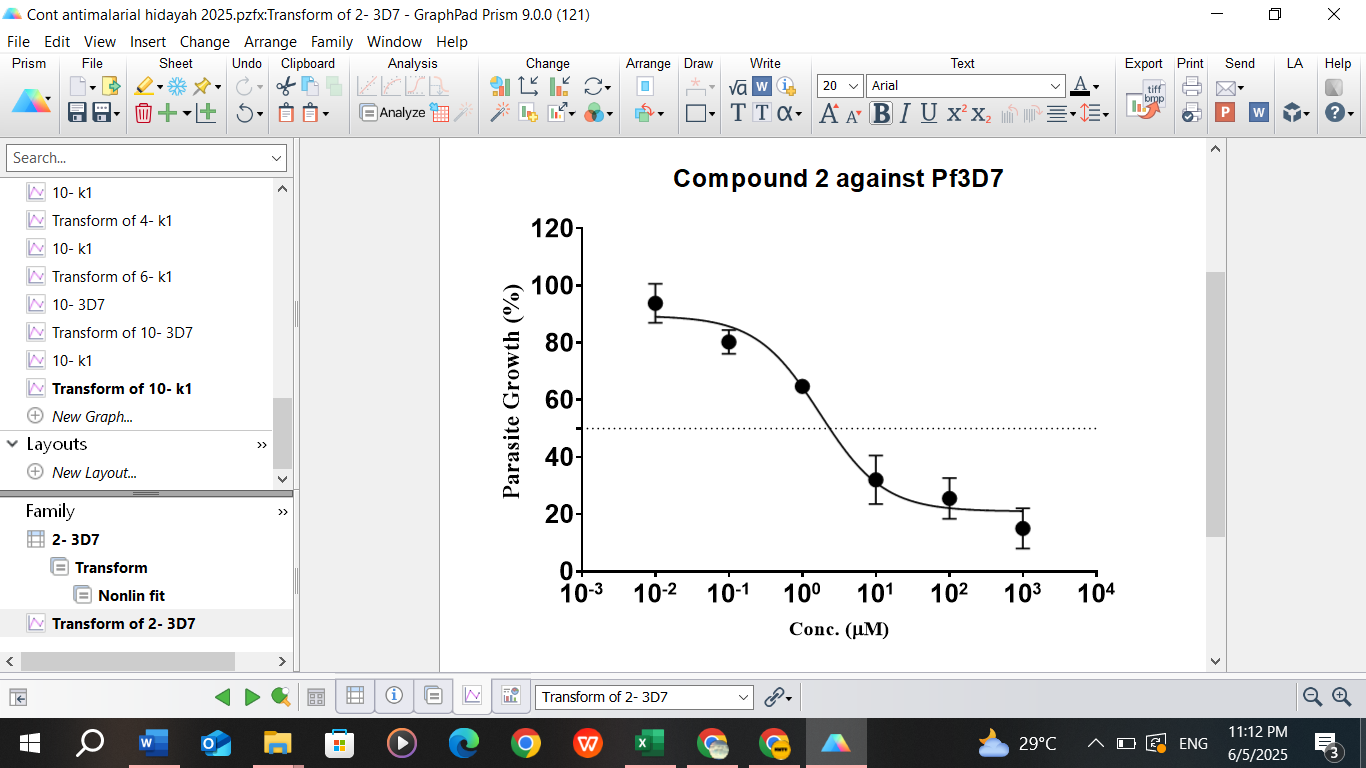 | Derivative **2** against K1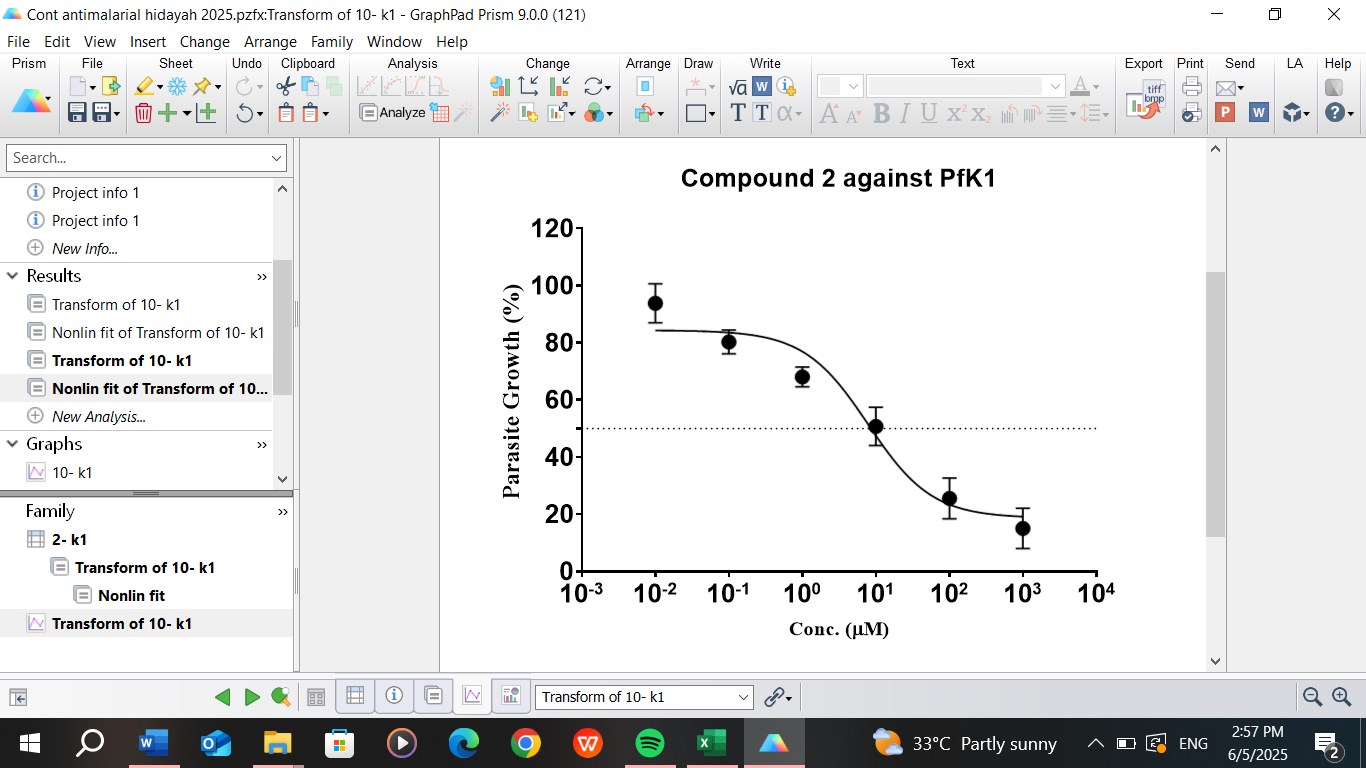 |
| Derivative **3** against 3D7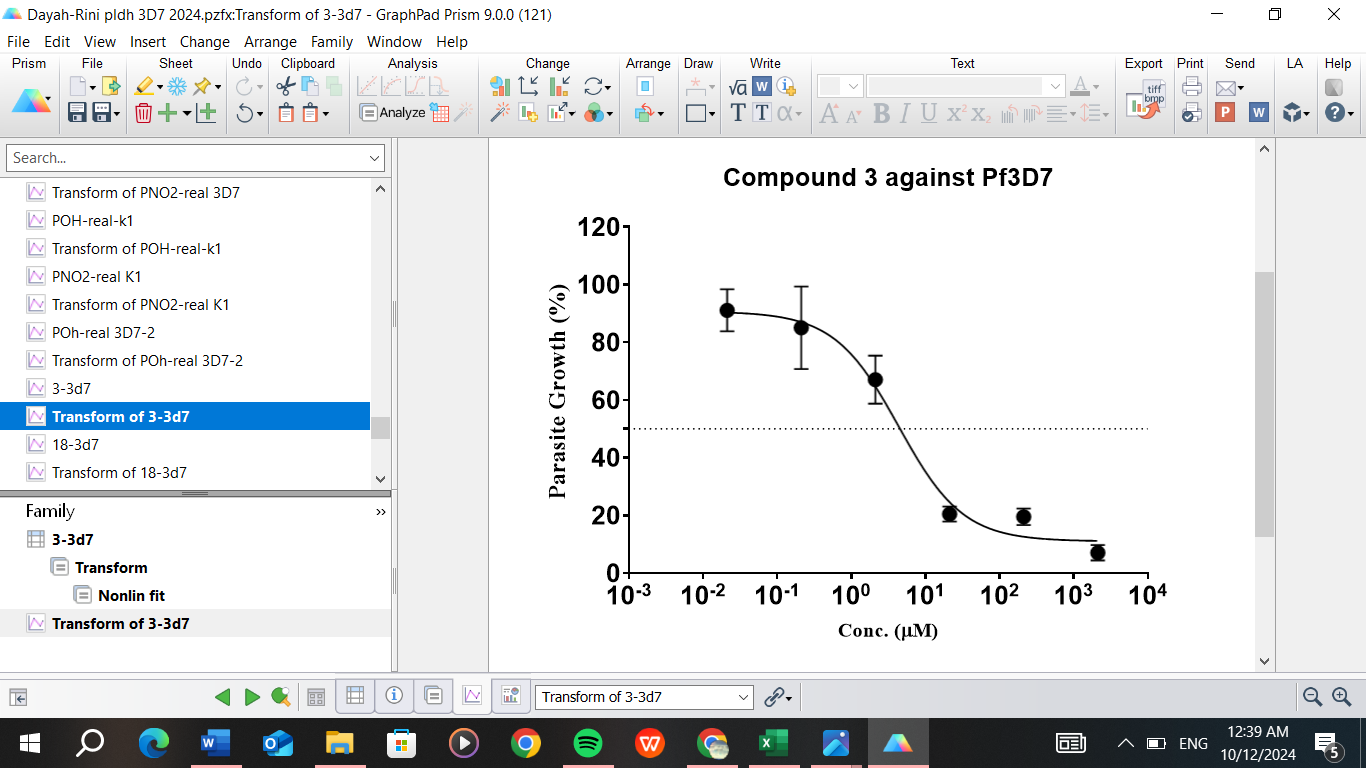 | Derivative **3** against K1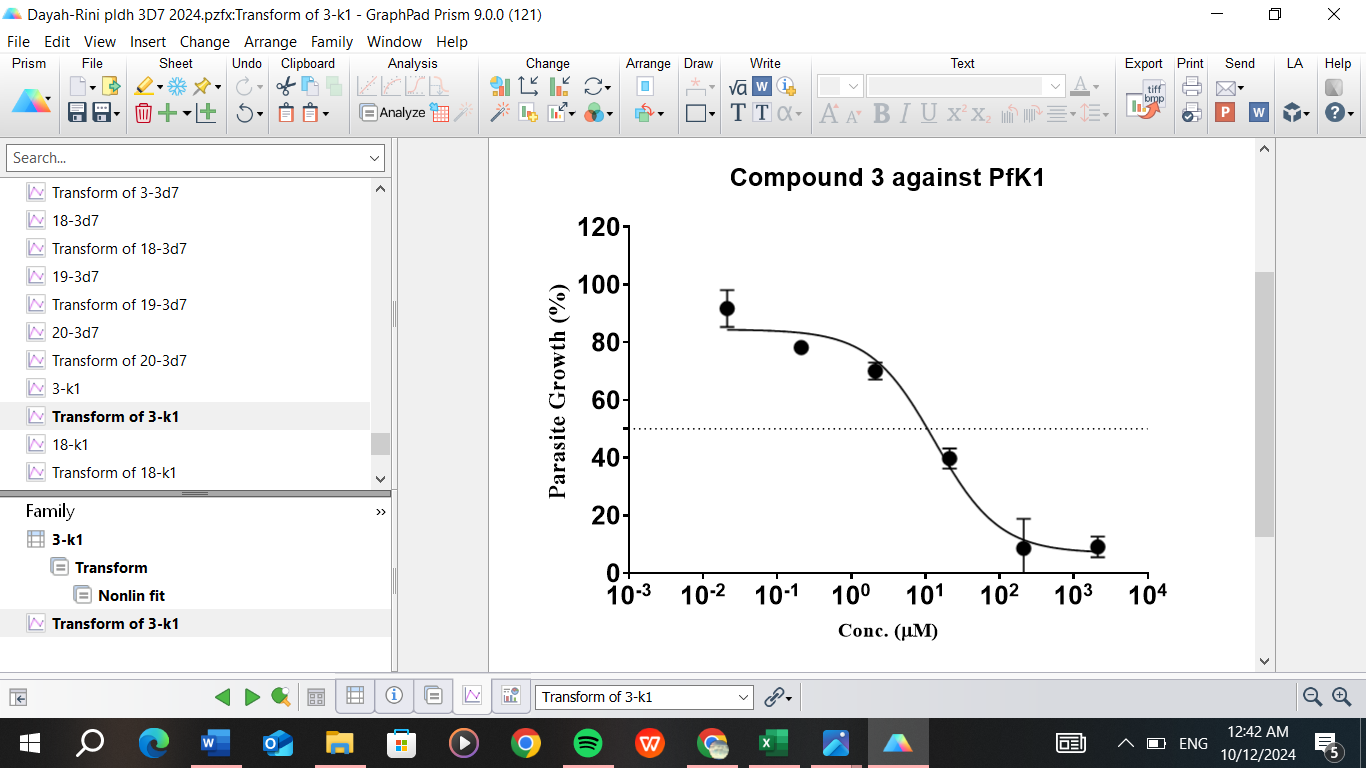 |
| Derivative **4** against 3D7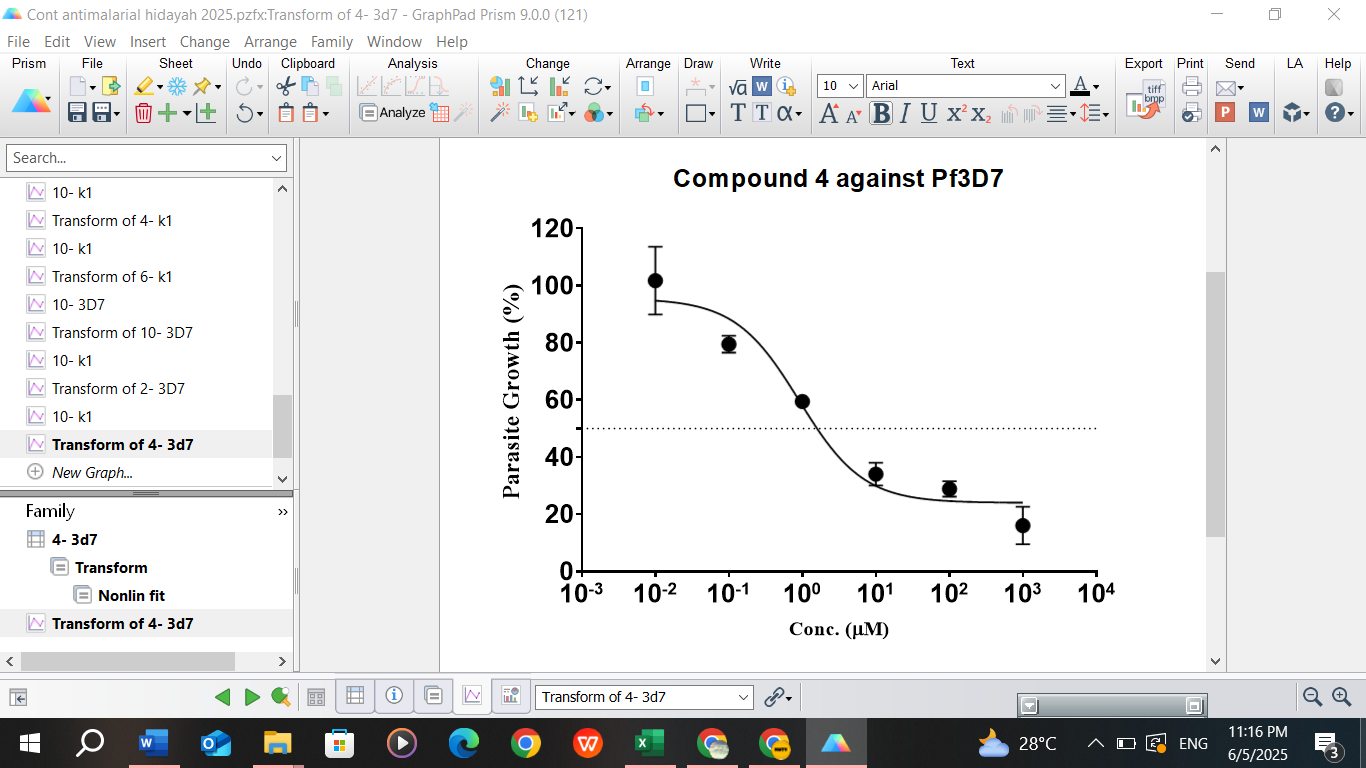 | Derivative **4** against K1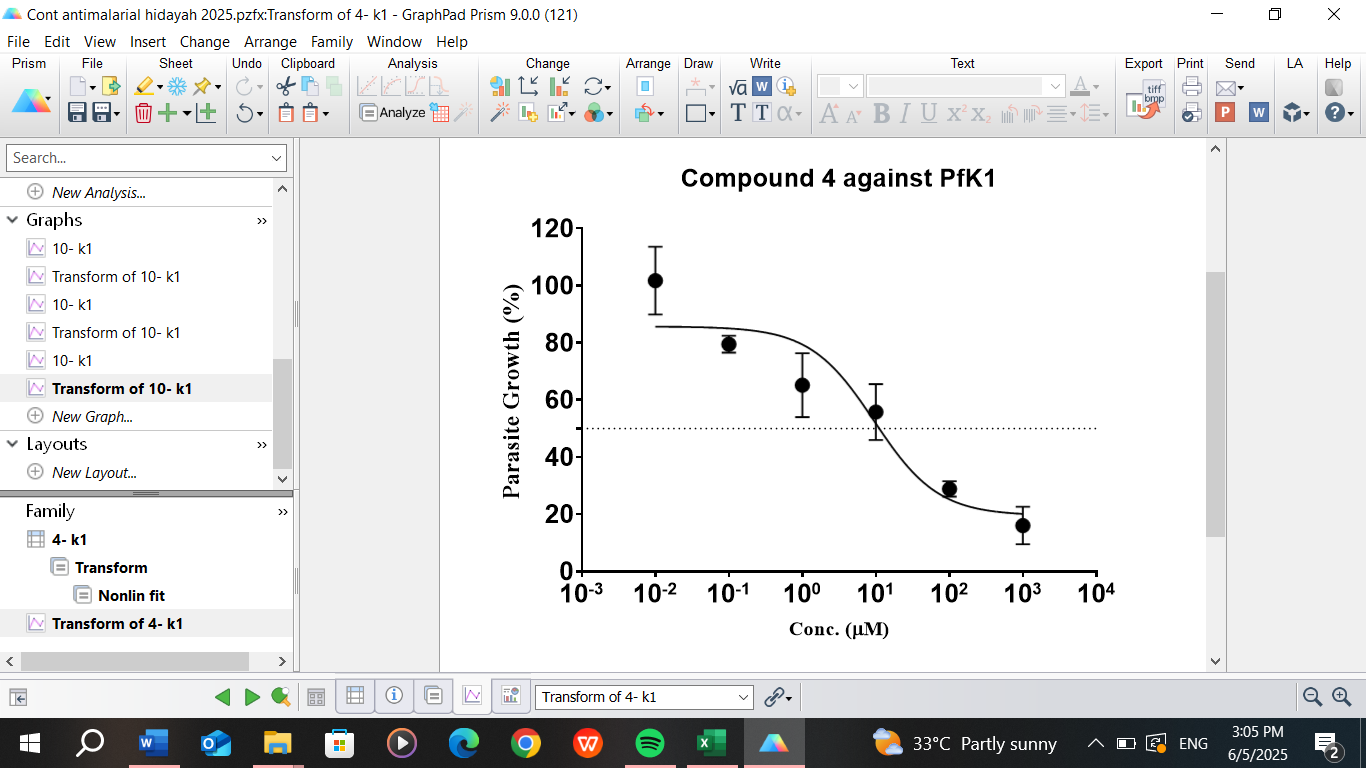 |
| Derivative **6** against 3D7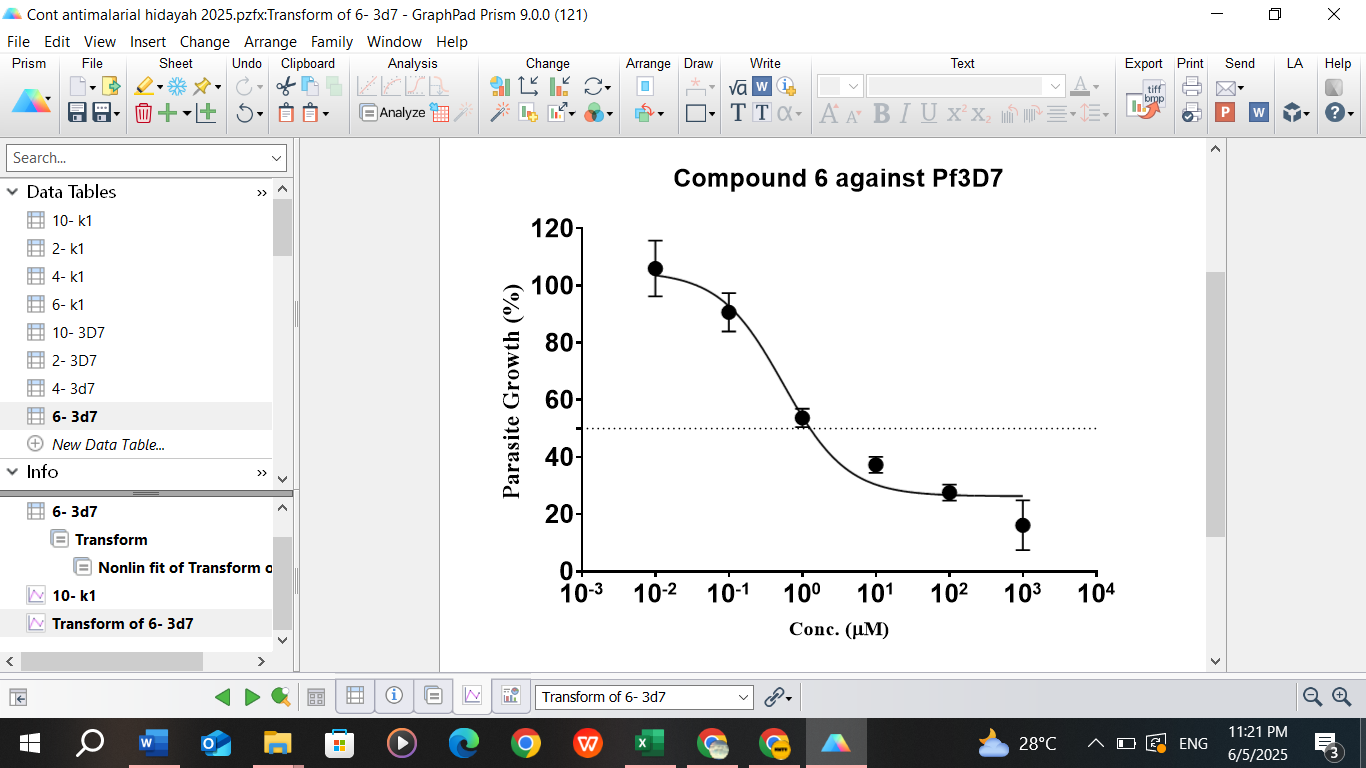 | Derivative **6** against K1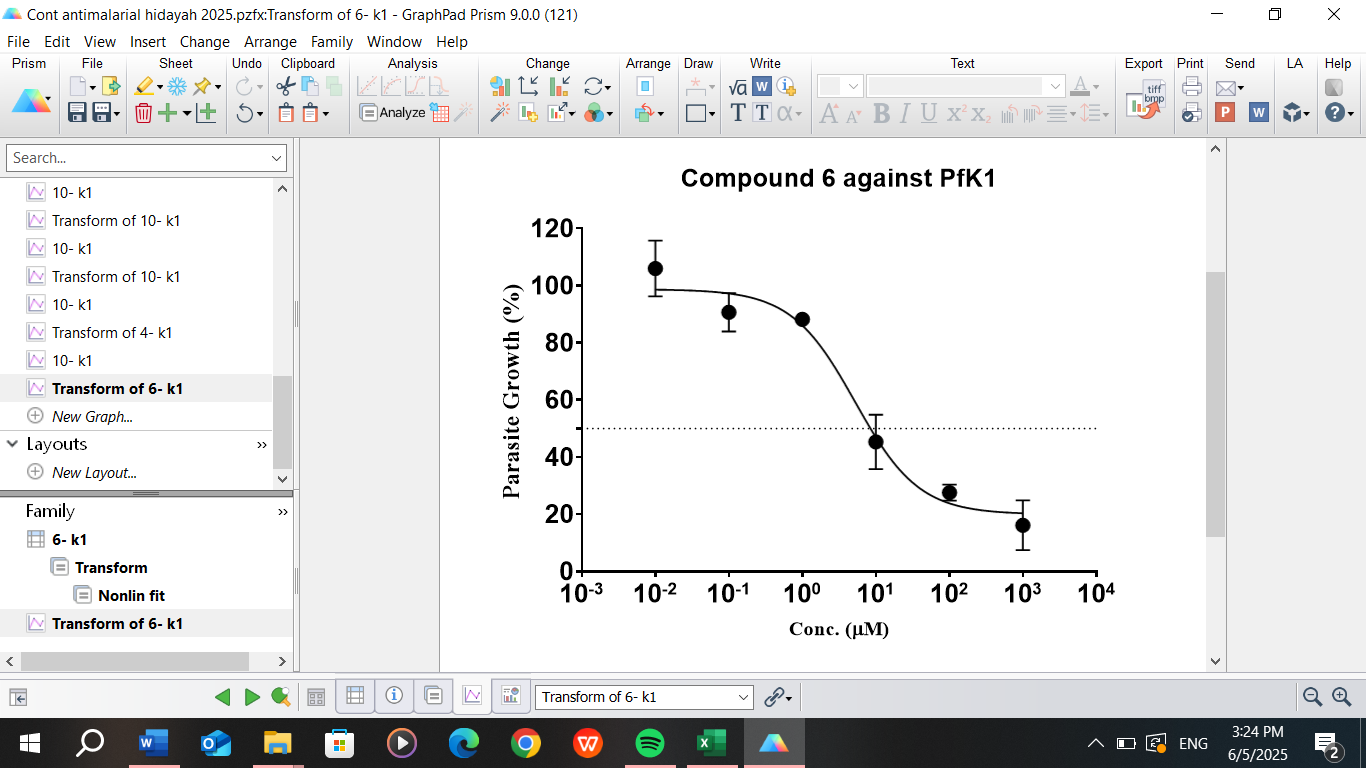 |
| Derivative **10** against 3D7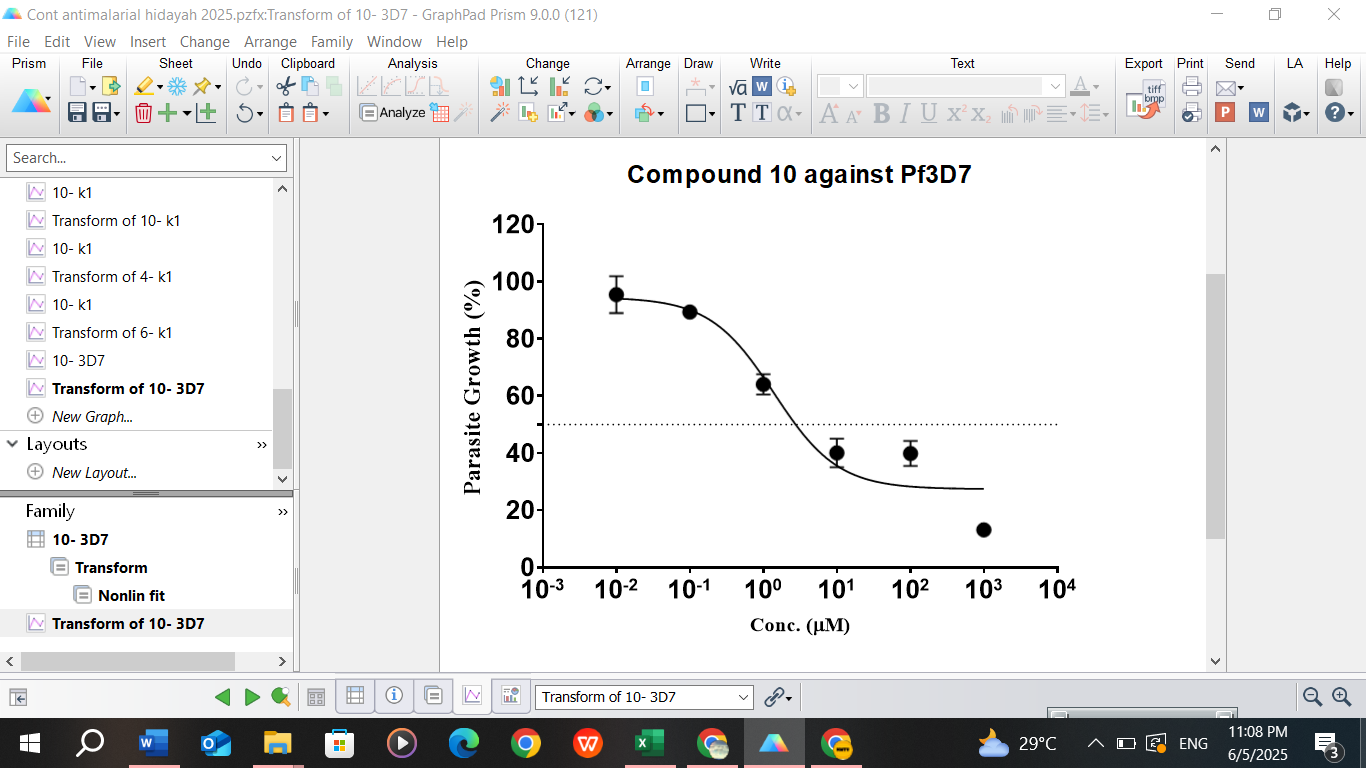 | Derivative **10** against K1 |
| Derivative **17** against 3D7 | Derivative **17** against K1 |
| Derivative **18** against 3D7 | Derivative **18** against K1 |
| Derivative **20** against 3D7 | Derivative **20** against K1 |
| Derivative **21** against 3D7 | Derivative **21** against K1 |
| Derivative **22** against 3D7 | Derivative **22** against K1 |

**Figure S13.** Figures showing the graphs of parasite growth against the concentration of compounds from pLDH assays.

**Results from MTT cytotoxicity assessment**

**Table S3.** MTT cytotoxicity data for derivative **2**.

| **Concentration**  **(µg/mL)** | **Log** **(µg/mL)** | **Percentage (%) of Cell Viability** | | |
| --- | --- | --- | --- | --- |
| 50.0 | 1.699 | 9.072383 | 9.585629 | 9.759227 |
| 25.0 | 1.398 | 9.359197 | 9.162956 | 9.208242 |
| 12.5 | 1.097 | 9.291267 | 9.766775 | 9.110122 |
| 6.25 | 0.799 | 10.29512 | 11.05744 | 10.72534 |
| 3.2 | 0.505 | 9.819609 | 10.04604 | 10.41588 |
| 1.6 | 0.204 | 10.76308 | 10.43852 | 10.70269 |
| 0.8 | -0.0969 | 10.81591 | 10.58948 | 11.18575 |
| 0.4 | -0.398 | 12.09148 | 12.44622 | 11.90279 |
| 0.2 | -0.699 | 12.64246 | 13.15571 | 11.31406 |

**Figure S14.** Figures showing the graphs of cell viability against log of concentration of derivative **2** from WRL-68 assay.

**Table S4.** MTT cytotoxicity data for derivative **3**.

| **Concentration**  **(µg/mL)** | **Log (µg/mL)** | **Percentage (%) of Cell Viability** | | |
| --- | --- | --- | --- | --- |
| 99.0 | 1.996 | 82.53506 | 82.18557 | 82.36031 |
| 49.5 | 1.695 | 80.31696 | 87.33908 | 83.82802 |
| 24.8 | 1.394 | 77.15918 | 79.82769 | 78.49344 |
| 12.4 | 1.093 | 89.41911 | 83.05709 | 86.2381 |
| 6.2 | 0.792 | 81.88995 | 89.40247 | 85.64621 |
| 3.1 | 0.491 | 88.93897 | 93.97099 | 91.45498 |
| 1.55 | 0.190 | 108.8459 | 99.2797 | 104.0628 |
| 0.77 | -0.114 | 104.9929 | 99.61399 | 102.3035 |
| 0.39 | -0.409 | 115.8242 | 103.0245 | 109.4243 |

**Figure S15.** Figures showing the graphs of cell viability against log of concentration of derivative **3** from WRL-68 assay.

**Table S5.** MTT cytotoxicity data for derivative **4**.

| **Concentration**  **(µg/mL)** | **Log (µg/mL)** | **Percentage (%) of Cell Viability** | | |
| --- | --- | --- | --- | --- |
| 50.0 | 1.699 | 10.98371 | 11.02063 | 9.839193 |
| 25.0 | 1.398 | 9.974566 | 10.64528 | 9.728433 |
| 12.5 | 1.097 | 10.34377 | 10.9591 | 10.34992 |
| 6.25 | 0.799 | 10.2207 | 11.20523 | 12.02363 |
| 3.2 | 0.505 | 10.30685 | 12.15285 | 11.51905 |
| 1.6 | 0.204 | 11.48829 | 12.83587 | 11.80211 |
| 0.8 | -0.0969 | 12.09747 | 15.80178 | 12.04209 |
| 0.4 | -0.398 | 21.75821 | 19.48148 | 26.31169 |
| 0.2 | -0.699 | 48.65447 | 42.0827 | 45.59011 |

**Figure S16.** Figures showing the graphs of cell viability against log of concentration of derivative 4 from WRL-68 assay.

**Table S6.** MTT cytotoxicity data for derivative **6**.

| **Concentration**  **(µg/mL)** | **Log (µg/mL)** | **Percentage (%) of Cell Viability** | | |
| --- | --- | --- | --- | --- |
| 50.0 | 1.699 | 6.267621 | 6.484494 | 5.677727 |
| 25.0 | 1.398 | 5.19627 | 5.135545 | 5.217957 |
| 12.5 | 1.097 | 5.322056 | 5.630015 | 5.612665 |
| 6.25 | 0.799 | 5.812188 | 5.968337 | 5.36543 |
| 3.2 | 0.505 | 6.974626 | 6.653654 | 6.766428 |
| 1.6 | 0.204 | 7.013663 | 12.12318 | 7.278248 |
| 0.8 | -0.0969 | 9.650835 | 12.73043 | 9.14769 |
| 0.4 | -0.398 | 15.7146 | 16.23075 | 13.04706 |
| 0.2 | -0.699 | 26.85318 | 35.7493 | 33.04272 |

**Figure S17.** Figures showing the graphs of cell viability against log of concentration of derivative **6** from WRL-68 assay.

**Table S7.** MTT cytotoxicity data for derivative **10**.

| **Concentration**  **(µg/mL)** | **Log (µg/mL)** | **Percentage (%) of Cell Viability** | | |
| --- | --- | --- | --- | --- |
| 50.0 | 1.699 | 22.97457 | 23.5068 | 23.35896 |
| 25.0 | 1.398 | 22.98936 | 23.71378 | 22.22058 |
| 12.5 | 1.097 | 23.25547 | 24.36428 | 24.46777 |
| 6.25 | 0.799 | 23.81727 | 24.0686 | 22.88587 |
| 3.2 | 0.505 | 25.96097 | 26.34536 | 27.32111 |
| 1.6 | 0.204 | 28.01597 | 28.93258 | 27.66115 |
| 0.8 | -0.0969 | 28.356 | 28.68125 | 28.59255 |
| 0.4 | -0.398 | 31.84506 | 33.85571 | 35.37847 |
| 0.2 | -0.699 | 44.23418 | 40.81904 | 41.01124 |

**Figure S18.** Figures showing the graphs of cell viability against log of concentration of derivative **10** from WRL-68 assay.

**Table S8.** MTT cytotoxicity data for derivative **17**.

| **Concentration**  **(µg/mL)** | **Log (µg/mL)** | **Percentage (%) of Cell Viability** | | |
| --- | --- | --- | --- | --- |
| 99.0 | 1.996 | 80.30588 | 82.18557 | 81.24572 |
| 49.5 | 1.695 | 82.58138 | 87.33908 | 84.96023 |
| 24.8 | 1.394 | 81.16328 | 79.82769 | 80.49548 |
| 12.4 | 1.093 | 90.09949 | 83.05709 | 86.57829 |
| 6.2 | 0.792 | 91.57649 | 89.40247 | 90.48948 |
| 3.1 | 0.491 | 94.15525 | 93.97099 | 94.06312 |
| 1.55 | 0.190 | 94.94939 | 99.2797 | 97.11455 |
| 0.77 | -0.114 | 106.8461 | 99.61399 | 103.2301 |
| 0.39 | -0.409 | 114.661 | 103.0245 | 108.8427 |

**Figure S19.** Figures showing the graphs of cell viability against log of concentration of derivative **17** from WRL-68 assay.

**Table S9.** MTT cytotoxicity data for derivative **18**.

| **Concentration**  **(µg/mL)** | **Log (µg/mL)** | **Percentage (%) of Cell Viability** | | |
| --- | --- | --- | --- | --- |
| 99.0 | 1.996 | 82.53506 | 94.59166 | 88.56336 |
| 49.5 | 1.695 | 80.31696 | 98.61904 | 89.468 |
| 24.8 | 1.394 | 77.15918 | 85.65303 | 81.4061 |
| 12.4 | 1.093 | 89.41911 | 87.86537 | 88.64224 |
| 6.2 | 0.792 | 81.88995 | 86.19386 | 84.0419 |
| 3.1 | 0.491 | 88.93897 | 91.99076 | 90.46486 |
| 1.55 | 0.190 | 108.8459 | 99.87048 | 104.3582 |
| 0.77 | -0.114 | 104.9929 | 96.13715 | 100.565 |
| 0.39 | -0.409 | 115.8242 | 103.1435 | 109.4838 |

**Figure S20.** Figures showing the graphs of cell viability against log of concentration of derivative **18** from WRL-68 assay.

**Table S10.** MTT cytotoxicity data for derivative **20**.

| **Concentration**  **(µg/mL)** | **Log (µg/mL)** | **Percentage (%) of Cell Viability** | | |
| --- | --- | --- | --- | --- |
| 50.0 | 1.699 | 9.681929 | 9.635331 | 9.391989 |
| 25.0 | 1.398 | 9.930449 | 9.412699 | 9.319504 |
| 12.5 | 1.097 | 10.78991 | 9.547314 | 9.712994 |
| 6.25 | 0.799 | 10.89864 | 9.635331 | 9.951159 |
| 3.2 | 0.505 | 11.46817 | 10.53622 | 10.67083 |
| 1.6 | 0.204 | 27.02656 | 23.77509 | 29.55836 |
| 0.8 | -0.0969 | 84.01015 | 84.25867 | 84.04639 |
| 0.4 | -0.398 | 89.26531 | 91.97315 | 85.38219 |
| 0.2 | -0.699 | 93.50569 | 96.05302 | 92.85332 |

**Figure S21.** Figures showing the graphs of cell viability against log of concentration of derivative **20** from WRL-68 assay.

**Table S11.** MTT cytotoxicity data for derivative **21**.

| **Concentration**  **(µg/mL)** | **Log (µg/mL)** | **Percentage (%) of Cell Viability** | | |
| --- | --- | --- | --- | --- |
| 50.0 | 1.699 | 13.40775 | 14.13001 | 14.50427 |
| 25.0 | 1.398 | 13.75575 | 13.83454 | 14.28102 |
| 12.5 | 1.097 | 13.92646 | 14.15627 | 13.29613 |
| 6.25 | 0.799 | 15.56796 | 19.40906 | 13.42745 |
| 3.2 | 0.505 | 19.78332 | 20.28234 | 22.17991 |
| 1.6 | 0.204 | 39.86868 | 41.19501 | 34.50427 |
| 0.8 | -0.0969 | 55.96848 | 48.54235 | 51.66776 |
| 0.4 | -0.398 | 62.00263 | 54.97702 | 53.79514 |
| 0.2 | -0.699 | 70.72226 | 66.57255 | 64.93762 |

**Figure S22.** Figures showing the graphs of cell viability against log of concentration of derivative **21** from WRL-68 assay.

**Table S12.** MTT cytotoxicity data for derivative **22**.

| **Concentration**  **(µg/mL)** | **Log (µg/mL)** | **Percentage (%) of Cell Viability** | | |
| --- | --- | --- | --- | --- |
| 50.0 | 1.699 | 8.844359 | 8.799747 | 7.92981 |
| 25.0 | 1.398 | 10.23849 | 9.033961 | 9.184527 |
| 12.5 | 1.097 | 9.703143 | 9.006078 | 9.128762 |
| 6.25 | 0.799 | 9.217986 | 8.582263 | 8.007881 |
| 3.2 | 0.505 | 27.16322 | 24.38612 | 25.09434 |
| 1.6 | 0.204 | 63.17081 | 79.52116 | 82.84477 |
| 0.8 | -0.0969 | 90.75227 | 95.65403 | 94.19856 |
| 0.4 | -0.398 | 97.07605 | 96.62435 | 102.6135 |
| 0.2 | -0.699 | 101.1079 | 103.9519 | 105.7308 |

**Figure S23.** Figures showing the graphs of cell viability against log of concentration of derivative **22** from WRL-68 assay.

**Results of ITC haemin binding assessments**

| **[Chloroquine]/[HMN] mole ratio** | **[Curcumin]/[HMN] mole ratio** |
| --- | --- |
| **[1]/[HMN] mole ratio** | **[2]/[HMN] mole ratio** |
| **[3]/[HMN] mole ratio** | **[4]/[HMN] mole ratio** |
| **[5]/[HMN] mole ratio** | **[6]/[HMN] mole ratio** |
| **[7]/[HMN] mole ratio** | **[8]/[HMN] mole ratio** |
| **[9]/[HMN] mole ratio** | **[10]/[HMN] mole ratio** |

**Figure S24**. Isothermal titration calorimetry profiles of the interaction between (A) HMN with antimalarial compounds were acquired in a 10 mM sodium phosphate buffer (pH 7.4) at 37 °C.

**Results from *in vitro* yeast-based GSK-3β inhibition**

We used a previously developed yeast-based assay with a temperature-sensitive strain expressing human GSK-3. This yeast cannot grow at 37 °C without functional GSK-3, but grows normally at 28 °C. When a GSK-3 inhibitor is present, growth at 37 °C is reduced, resulting in a larger zone of inhibition compared to 28 °C. In our experiment, none of the test compounds showed inhibitory activities, as no zones of inhibition were observed for all compounds except for derivative **20**. The positive control, TDZD-8 showed clear GSK-3β inhibition, with a zone of 18.00 ± 1.66 mm at 37 °C and 16.67 ± 1.41 mm at 28 °C.

**Table S13.** Observation on the zone of inhibition produced by derivative **20**, the only active compound identified in this study

| Monocarbonyl curcumin derivative **20** | | | | | |
| --- | --- | --- | --- | --- | --- |
| 28 ℃ | | | 37 ℃ | | |
|  | | |  | | |
|  | | | | | |
| Position | Sample | Inhibition zone, mm | | | Remarks |
| 28 ℃ | | 37 ℃ |
|  | 1) 0.0002 M | 7.50±0.71 | | 8.00±0.00 | Selective inhibition of GSK-3β at 0.02 M |
| 2) 0.002 M | 7.00±0.00 (p) | | 8.00±0.00 |
| 3) 0.02 M | 0.00±0.00 | | 7.00±0.00 |
| 4) 0.05 M | 0.00±0.00 | | 0.00±0.00 |
| 5) 0.5 M | 0.00±0.00 | | 0.00±0.00 |
| 6) DMSO | 0.00±0.00 | | 0.00±0.00 |
| (+ve) TDZD-8  (0.02 M) | 16.67±1.41 | | 18.00±1.66 | Non-selective inhibition of GSK-3β |

Note: (p) = Partial inhibition
